1 **Title**

2 **Comparative genomic analysis of *Bradyrhizobium* strains with natural variability in the**  
3 **efficiency of nitrogen fixation, competitiveness, and adaptation to stressful edaphoclimatic**  
4 **conditions**

5  
6 **Authors and affiliations**

7 Milena Serenato Klepa<sup>1,2</sup>, George Colin diCenzo<sup>3</sup>, Mariangela Hungria<sup>1,2</sup>

8  
9 **Affiliations**

10 <sup>1</sup>Soil Biotechnology Laboratory, Embrapa Soja, Cx. Postal 4006, CEP 86.085-981, Londrina,  
11 Paraná, Brazil

12 <sup>2</sup>CNPq, Setor de Autarquias Sul (SAUS), Quadra 01, Lote 01 e 06, Bloco H, Edifício Telemundi  
13 II, CEP 70.070-010, Brasília, Federal District, Brazil

14 <sup>3</sup>Department of Biology, Queen's University, Kingston, Ontario, K7L 3N6, Canada

15

16 M.S.K. – (0000-0003-4456-4345); milenaserenato@gmail.com.

17 G.C.dC – (0000-0003-3889-6570); george.dicenzo@queensu.ca

18 M.H. – (0000-0002-5132-8685); mariangela.hungria@embrapa.br

19

20

21  
22  
23  
24  
25  
26  
27  
28  
29  
30  
31  
32  
33  
34  
35  
36  
37  
38  
39  
40  
41

## ABSTRACT

*Bradyrhizobium* is known for its ability to fix atmospheric nitrogen in symbiosis with agronomically important crops. This study focused on two groups of strains, each containing eight putative natural variants of *B. japonicum* SEMIA 586 (=CNPSo 17) or *B. diazoefficiens* SEMIA 566 (=CNPSo 10), previously used as commercial inoculants for soybean crops in Brazil. We aimed to detect genetic variations that might be related to biological nitrogen fixation, competitiveness for nodule occupancy, and adaptation to the stressful conditions of the Brazilian Cerrado soils. High-quality genome assemblies were produced for all strains and used for comparative genomic analyses. The core genome phylogeny revealed that strains of each group are closely related, confirmed by high average nucleotide identity (ANI) values. However, variants accumulated divergences resulting from horizontal gene transfer (HGT), genomic rearrangements, and nucleotide polymorphisms. The *B. japonicum* group presented a larger pangenome and a higher number of nucleotide polymorphisms than the *B. diazoefficiens* group, probably due to its longer adaptation time to the Cerrado soil. Interestingly, five strains of the *B. japonicum* group carry two plasmids. The genetic variability found in both groups is discussed in light of the observed differences in their nitrogen fixation capacity, competitiveness for nodule occupancy, and environmental adaptation.

**Key words:** SEMIA 5079, SEMIA 5080, natural variants, pangenomes, saprophytic ability, plasmids.

42

## SIGNIFICANCE

43 The two main reference strains for soybean inoculation in Brazil, *B. japonicum* CPAC 15 (=SEMIA  
44 5079) and *B. diazoefficiens* CPAC 7 (=SEMIA 5080), have been considered highly competitive  
45 and highly efficient in nitrogen fixation, respectively. In this study, we obtained and analyzed the  
46 genomes of the parental and variant strains. We detected two plasmids in five strains and several  
47 genetic differences that might be related to adaptation to the stressful conditions of the soils of the  
48 Brazilian Cerrado biome. We also detected genetic variations in specific regions that may impact  
49 symbiotic nitrogen fixation. Our analysis contributes to new insights into evolution of  
50 *Bradyrhizobium*, and some of the identified differences may be applied as genetic markers to assist  
51 strain selection programs.

52

53

## INTRODUCTION

54 Agriculture faces global challenges to feed the world's growing population in the coming years  
55 (United Nations, 2017). Major concerns associated with the need for increased crop production  
56 relate to the degradation of natural ecosystems and the emission of greenhouse gases (Tilman et  
57 al., 2011). Technologies based on plant growth-promoting bacteria have high potential to support  
58 the development of more sustainable agricultural practices. Biological nitrogen fixation (BNF)  
59 refers to the reduction of the atmospheric nitrogen ( $N_2$ ) into assimilable forms by a diverse group  
60 of prokaryotic organisms. When performed in association with plants, the fixed nitrogen (N) may  
61 be used by the plants to help meet their N demand. In terrestrial ecosystems, the primary source of  
62 BNF is the N-fixing endosymbiosis between legume plants and bacteria collectively known as  
63 rhizobia, with the global contribution of symbiotic N fixation estimated at around 35 million tons  
64 of N fixed in 2018 (Herridge et al., 2022).

65 Brazil is a leader in the application of elite *Bradyrhizobium* strains as inoculants in soybean  
66 (*Glycine max* (L.) Merrill) fields. In the 2022/2023 crop season, around 44 million hectares were  
67 cropped with soybean, with 110 million doses of inoculants applied. Considering the methodology  
68 of Telles et al. (2023), economic savings due to the replacement of N-fertilizers with BNF in  
69 Brazilian soybean crops was US\$27.4 billion in 2022/2023, in addition to mitigating 236 million  
70 equivalents of  $CO_2$ .

71 The success of BNF in Brazil results from a long-term strain selection program, which  
72 started by looking for variants of exotic introduced *Bradyrhizobium* strains adapted to tropical  
73 conditions and Brazilian soybean genotypes (Hungria and Mendes, 2015). Currently, the elite  
74 strains *B. japonicum* CPAC 15 (=SEMIA 5079) and *B. diazoefficiens* CPAC 7 (= SEMIA 5080),  
75 two such natural variants, compose most of the soybean commercial inoculants. Numerous other

76 natural variants of past inoculant strains have been also isolated from Brazilian soils and today are  
77 recommended for other legumes or grasses (Hungria et al., 2000; Hungria et al., 2010; Hungria and  
78 Mendes, 2015). The variants differ in their N-fixation capabilities and competitiveness for legume  
79 nodule occupancy, although in most cases, the genetic variations responsible for the phenotypic  
80 differences are not yet known.

81 Species of the genus *Bradyrhizobium* display broad variation in lifestyles and legume host  
82 range, presumably influencing the group's genetic organization (Ormeño-Orrillo and Martínez-  
83 Romero, 2019). Conceptually, pangenomes represent the entire set of genes of a phylogenetically  
84 related group of strains, fractioned into core and dispensable genomes (Tettelin et al., 2008). The  
85 core genome consists of genes shared by all strains of the group and usually codes essential  
86 functions. In contrast, the dispensable genome refers to genes present in a subset of strains (the  
87 accessory genome) or only in individual strains (the unique genome), and it is composed of genes  
88 that may provide additional functions for those strains and often relate to environmental adaptation  
89 (Vernikos et al., 2015). Analyses of bacterial pangenomes may elucidate genomic variability even  
90 between closely related strains within a species, and reveal information about horizontal gene  
91 transfer (HGT) and evolution (Medini et al., 2005).

92 Events of HGT, recombination, and mutations are some of the main drivers of bacterial  
93 evolution (Arnold et al., 2022). HGT refers to the transfer of DNA segments from one organism to  
94 another. Mobile genetic elements such as plasmids and integrative conjugative elements (ICE) may  
95 contribute to the fitness of recipient bacteria by conferring selective advantages, including legume  
96 symbiosis, antibiotic resistance, and pathogenicity (Juhas et al., 2008; Weisberg et al., 2022).  
97 Concerning the genomes of rhizobia, symbiotic plasmids (i.e., plasmids encoding the determinants  
98 of legume symbiosis) are most prevalent in the genera *Sinorhizobium* and *Rhizobium*, whereas the  
99 genera *Bradyrhizobium* and *Mesorhizobium* usually carry their symbiotic genes in genomic islands

100 integrated into the chromosomes, known as symbiosis islands (SI) (Wang et al., 2019; Weisberg et  
101 al., 2022). Genomic islands are commonly inserted at tRNA genes and may present a lower GC  
102 mol % in comparison to the remaining chromosome, in addition to a high number of genes  
103 encoding hypothetical proteins, plasmid conjugation, integrases, insertion sequences (IS), and  
104 transposases (Juhas et al., 2008). This movement of DNA segments may prompt genome  
105 recombination, including inversions, translocations, duplications, nucleotide polymorphisms, and  
106 indels, resulting in genetic variability even between closely related strains (Hughes, 2000).

107 In this study, we evaluated the genetic variability of two groups of closely related natural  
108 variants of *B. japonicum* and *B. diazoefficiens* adapted to Brazilian Cerrado soils – the main  
109 cropping area in the country – for longer or shorter periods, respectively. Each group included the  
110 parental strain previously used as a commercial inoculant in Brazil, one natural variant strain  
111 currently used in commercial inoculants and treated as the reference genome, and seven other  
112 putative natural variants. The *B. japonicum* strains were previously shown to vary in their  
113 competitiveness for nodule occupancy, while the *B. diazoefficiens* strains differ in their capacity  
114 for BNF (**Table 1**). Previously, a chromosome-level genome sequence existed only for strain  
115 CPAC 15 (reference strain for the *B. japonicum* group) (Siqueira et al., 2014). Here, we report  
116 complete or high-quality draft genomes for the remaining 17 strains. Subsequent comparative  
117 genomic analyses allowed for the identification of genetic differences that may explain the  
118 observed differences in their capacity for BNF capacity and competitiveness for nodule occupancy.

119

120

## RESULTS

### 121 Whole genome sequencing statistics

122 Hybrid genome assembly using Oxford Nanopore Technologies (ONT) and Illumina reads from

123 the *B. japonicum* strains (excluding CPAC 15, for which the published genome was used) resulted  
124 in seven finished genomes and one strain with the chromosome split into two contigs (**Table 2**).  
125 The genomes ranged from 9,584,431 bp to 10,367,856 bp, which is comparable to the published  
126 genome of the reference strain CPAC 15, estimated at 9,583,027 bp (Siqueira et al., 2014), and of  
127 the type strain USDA 6<sup>T</sup> with 9,207,384 bp (Kaneko et al., 2011). The total number of coding genes  
128 ranged from 8,758 to 9,472. The GC content (mol %) ranged from 63.34% to 63.55%.

129 The genome assemblies from the *B. diazoefficiens* group resulted in finished genomes for  
130 all nine strains (**Table 2**). The genome sizes were smaller than those of the *B. japonicum* group,  
131 ranging from 9,120,098 bp to 9,138,003 bp, which is very close to the genome size of the type  
132 strain USDA 110<sup>T</sup> (9,105,828 bp) (Kaneko et al., 2002), and of the original draft genome of  
133 reference strain CPAC 7, estimated at 9,138,870 bp (Siqueira et al., 2014). The total number of  
134 coding genes ranged from 8,220 to 8,244, and the GC content (mol %) from 63.96% to 63.97%.

135 We computed the average nucleotide identity (ANI) of each parental and variant against  
136 the reference strain of each group (CPAC 15 and CPAC 7). The strains of both groups shared high  
137 ANI values, confirming that they are closely related. The *B. japonicum* strains shared values equal  
138 to or higher than 99.82 % with CPAC 15, and all strains of the *B. diazoefficiens* group shared  
139 ~99.99 % with CPAC 7. ANI comparisons against the species type strains, *B. japonicum* USDA 6<sup>T</sup>  
140 and *B. diazoefficiens* USDA 110<sup>T</sup>, confirmed the species designations of all strains were accurate  
141 (**Table 2**).

142

### 143 **Core genome phylogeny and genome synteny**

144 As expected, the *B. japonicum* and *B. diazoefficiens* groups were separated into two clades with  
145 high bootstrap support in a core-genome phylogeny (**Figure 1**). The type strains *B. japonicum*  
146 USDA 6<sup>T</sup> and *B. diazoefficiens* USDA 110<sup>T</sup> were included in the phylogeny and presented a basal

147 position in the respective clade of each species. Since we are working with closely related strains  
148 in each group, the core genome phylogeny showed low differentiation between the strains of both  
149 groups. Interestingly, the *B. japonicum* group could be sub-divided into two well-supported  
150 monophyletic groups. The five variants of the *B. japonicum* group with a genome size > 10.2 Mb  
151 (compared to ~ 9.6 Mb for the other *B. japonicum* strains) formed one monophyletic group,  
152 suggesting an ancestral genome enlargement at the base of this clade, while the other four strains  
153 (including CPAC 15) formed a second monophyletic group (**Figure 1**).

154 The genomes of the *B. japonicum* group are highly syntenic; however, it is possible to  
155 observe rearrangements, including inversions, transpositions, and additions/deletions (**Figure 2a**).  
156 By comparing the genome of the *B. japonicum* reference strain CPAC 15 and its parental CNPSo  
157 17, we observed a possible inversion of a large segment (around 3,500,000 bp). The strains CNPSo  
158 23, CNPSo 24, CNPSo 29, CNPSo 31, CNPSo 34, and CNPSo 38 are highly syntenic with CNPSo  
159 17, indicating conservation of the gene order. On the other hand, strain CNPSo 22, which is  
160 polyphyletic with CPAC 15, appears to have the same inversion present in CPAC 15. However,  
161 we note that CPAC 15 and CNPSo 22 are the only genomes not assembled using Flye, and thus we  
162 cannot rule out that the putative inversion instead reflects assembly errors. Other small inversions  
163 were detected, as well as translocations and deletions; however, they are unlikely to impact the  
164 symbiosis islands (**Figure 2a**). We found a higher number of IS and transposases in the five larger  
165 genomes. *B. japonicum* strains CNPSo 22, CNPSo 29, CNPSo 31, CNPSo 34, and CNPSo 38  
166 (genome size > 10.2 Mb) have around 121 ISs and 29 transposase genes, whereas the strains CPAC  
167 15, CNPSo 17, CNPSo 23, and CNPSo 24 (genome size ~ 9.6 Mb) contain around 68 and 10,  
168 respectively.

169 The genomes of the *B. diazoefficiens* group are highly syntenic (**Figure 2b**), and unlike the  
170 *B. japonicum* group, displayed no relevant rearrangements. The strains of the *B. diazoefficiens*



171 group contained 69 ISs and nine transposase genes.

172

### 173 **Plasmid content**

174 We identified two sets of orthologous plasmids in the five *B. japonicum* strains with larger genomes  
175 (strains CNPSo 22, CNPSo 29, CNPSo 31, CNPSo 34, and CNPSo 38), which were confirmed as  
176 plasmids by the presence of a *repABC* operon encoding proteins responsible for plasmid replication  
177 and partitioning (Cevallos et al., 2008). Plasmid “a” presented high similarity among the strains,  
178 with 98 to 99.9% of identity and sizes ranging from 160,017 bp to 170,161 bp. Plasmid “b” shared  
179 96.6 to 99.9% identities among the strains and sizes ranging from 283,210 bp and 291,690 bp.  
180 Interestingly, the plasmids did not account for the full difference in the genome sizes of these five  
181 *B. japonicum* strains compared to the four with smaller genomes (CPAC 15, CNPSo 17, CNPSo  
182 23, and CNPSo 24), indicating that this lineage also experienced an ancestral chromosome  
183 enlargement. No plasmids were found in the strains of the *B. diazoefficiens* group.

184 A BLASTn search showed that a segment (~49,500 bp) of plasmid “a” of all variants shares  
185 >99.95% identity to the 210 kb plasmid pNK6b (GenBank accession AP014686.1) of *B.*  
186 *diazoefficiens* NK6 (Iida et al., 2015). The number of genes on the “a” plasmids ranged from 123  
187 to 132, and encoded a type III secretion system (T3SS), which is known to participate in host cell  
188 infections, including symbiotic interactions (Teulet et al., 2022). The T3SS cluster of plasmid “a”  
189 is composed of the secretion and cellular translocation (*sct*) genes (*sctNVJQRSTU*) in all strains  
190 except for CNPSo 29, which contained a putative deletion of eight genes caused by an IS4 family  
191 transposase, including part of T3SS apparatus. Interestingly, plasmid “a” also harbors genes related  
192 to stress responses, including genes coding for toxin-antitoxin systems (TA systems) (MazE/MazF,  
193 Phd/YefM), a secretion protein (HlyD family efflux transporter periplasmic adaptor subunit; lost  
194 in CNPSo 38), a heat-shock protein (molecular chaperone HtpG), and a trehalose-6-phosphate

195 synthase. A LysR substrate-binding domain-containing protein related to nitrogen metabolism was  
196 also identified. Moreover, plasmid “a” contained the gene clusters *traADGFHM* and  
197 *trbBCDEFGHIJKL* related to conjugation.

198 The entire sequence of plasmid “b” shared around 99.99% identity with the 290 kb plasmid  
199 pN03G-2 of *B. japonicum* pN03G-2 (GenBank accession CP126012), suggesting common  
200 ancestry. The number of genes on the “b” plasmids ranged from 212 to 219, and the annotation  
201 revealed genes encoding proteins related to stress responses, such as TA systems (VapB/VapC,  
202 Phd/YefM, AbiEii/AbiGii), efflux transporters (HlyD and HlyB families), a cold-shock protein,  
203 heat-shock proteins (chaperonin GroEL, co-chaperone GroES), and an O-antigen gene cluster.  
204 Plasmid “b” also carries several genes encoding proteins involved in the synthesis, transport,  
205 metabolism, and regulation of amino acids, nucleic acids, carbohydrates, and lipids. Even though  
206 no T3SS genes were detected, two T3SS effector proteins (C48 family peptidase and E3 ubiquitin-  
207 -protein ligase) were identified. The conjugation apparatus of plasmid “b” is encoded by  
208 *traACDFGM* and *trbBCDEJLFGIH*. More information about the gene contents of the plasmids is  
209 presented in **Table S1**.

210

## 211 **Symbiosis islands**

212 The symbiosis islands (SIs) A and B of both groups were detected according to Weisberg et al.  
213 (2022), whereas the SI C was identified as the region proposed by Kaneko et al. (2011). In addition,  
214 the automatic annotation of SI A was manually curated according to previous studies (Kaneko et  
215 al., 2002; Teulet et al., 2020; Weisberg et al., 2022). SI A of the *B. japonicum* and *B. diazoefficiens*  
216 groups were bordered by tRNA-valine and a recombinase gene. Within each group of strains, the  
217 SIs are highly syntenic (**Figure S1; Figure S2**), although some differences in gene content are  
218 evident.

219           The average size of SI A in the *B. japonicum* genomes is ~690,000 bp and can be found  
220 between the chromosomal positions 7,581,129 and 8,615,546 depending on the strain. SI A  
221 contains between 584 to 615 genes. SI A of all *B. japonicum* strains carried the genes classically  
222 important for nodulation and nitrogen fixation, including: *nodD2DIABCSUIJZ*, *noeEIL*,  
223 *nolAIKNOY*, *nolUV*, the regulatory system *nodV/nodW*, the nitrogen fixation genes *fixABCKRWX*  
224 and *nifABDEHKNQSTWXZ*, T3SS genes (*sct*, also referred to as ‘*Rhizobium*-conserved’ genes,  
225 *rhc*) *rhcC1C2DJNQRSTUV*, and genes encoding T3SS effector proteins known as nodulation outer  
226 proteins (*nop*), *nopAALARBWEIHLMP1P2P3*. In addition to these symbiosis genes, between 155  
227 and 222 hypothetical genes, 75 IS from diverse families of transposases, and 100 pseudogenes were  
228 annotated. Interestingly, the monophyletic group of strains carrying plasmids had a smaller SI A  
229 (28 fewer genes on average) than those without plasmids (**Figure S1a**); none of the known  
230 symbiosis genes were absent from SI A in these strains. SI B of the *B. japonicum* group, located  
231 between chromosomal positions 1,465,741 and 1,809,591 depending on the strain, is entirely  
232 syntenic among the strains (data not shown) and contains 4,160 bp with seven genes; an integrase  
233 gene and *ybgC* served as the borders of this SI, with five intervening hypothetical genes. With an  
234 average size of 203,000 bp, SI C was also highly syntenic and smaller in the strains carrying  
235 plasmids (18 fewer genes on average) (**Figure S1b**). SI C can be found between chromosomal  
236 positions 8,807,943 and 9,339,632 depending on the strain. The region is bordered by genes coding  
237 for a tyrosine-type recombinase/integrase and a 5'-methylthioadenosine/S-adenosylhomocysteine,  
238 and includes ~225 genes, with 59 to 65 hypothetical genes, 36 pseudogenes, and 24 IS of various  
239 transposase families. The average GC mol content of SI A, B, and C of the *B. japonicum* group  
240 was 60.58%, compared to 63.34% to 63.55% for the genome-wide average.

241           SI A of the *B. diazoefficiens* group is slightly smaller than in the *B. japonicum* group, with  
242 an average size of 671,500 bp. It is located between the chromosomal positions 7,426,338 and

243 8,082,430. The average number of genes within SI A is 570, including 155 hypothetical genes, 85  
244 IS from diverse transposase families, and 97 pseudogenes. This region in *B. diazoefficiens* is highly  
245 syntenic, except for a ~2 kb deletion in the genome of CNPSo 106 (**Figure S2a**). The nodulation,  
246 nitrogen fixation, and T3SS genes are preserved as in the *B. japonicum* group. SI B, which is  
247 conserved across strains (data not shown), is 15,546 bp in length and is located between  
248 chromosomal positions 1,661,452 and 1,677,009. This region contains 15 genes, including nine  
249 hypothetical genes, one pseudogene, and one IS5 family transposase. SI C of the *B. diazoefficiens*  
250 group is found between the chromosomal positions 620,318 and 776,578 in the genomes and is  
251 ~156,300 bp in length. The average number of genes is 156, with 49 hypothetical genes, 31  
252 pseudogenes, and 16 IS from different transposase families. This region also displays high synteny  
253 across the strains (**Figure S2b**). The average GC mol content of SI A, B, and C of the *B.*  
254 *diazoefficiens* group was 59.96%, compared to 63.96% to 63.97% for the genome-wide average.

255

## 256 **Pangenome analysis**

257 A pangenome analysis was performed to understand the genomic variability of the strains. The  
258 pangenome of the *B. japonicum* group comprises 10,550 genes, 8,787 of which belonging to the  
259 core genome, 1,559 to the accessory genome, and 204 unique genes. Interestingly, 748 genes were  
260 shared only between the monophyletic group of strains carrying the plasmids; in contrast, only 187  
261 genes were shared only between the strains without a plasmid (**Figure 3a**). In addition, strain  
262 CNPSo 22 carries the largest number of unique genes (44), followed by CNPSo 17 (31), and then  
263 CNPSo 29 and CNPSo 38 (each with 27). Of the dispensable genome fraction, 148 genes (125  
264 accessory genes and 23 unique genes) belong to SI A and thus are the most likely to contribute to  
265 the differences in BNF capacity and competitiveness of these strains (**Table S2**).

266 The *B. diazoefficiens* group has a smaller pangenome than the *B. japonicum* group,

267 consistent with the *B. diazoefficiens* strains being more closely related than the *B. japonicum* strains  
268 **(Table 2)**. This pangenome contains a total of 8,665 genes, composed of 8,428 core, 107 accessory,  
269 and 130 unique genes. The strain CNPSo 104 presented the largest number of unique genes (22),  
270 followed by CNPSo 106 (18), and then CNPSo 107 and CNPSo 108 (each with 17) **(Figure 3b)**.  
271 Interestingly, 21% of the dispensable genome fraction falls within SI A, and it includes 37  
272 accessory genes and 13 unique genes **(Table S3)**.

273

### 274 **Nucleotide polymorphisms**

275 We next used Snippy to search for nucleotide variations, using CPAC 15 and CPAC 7 as the  
276 reference genomes for the *B. japonicum* and *B. diazoefficiens* groups, respectively. Snippy detects  
277 five types of nucleotide variants: single nucleotide polymorphisms (SNPs), multiple nucleotide  
278 polymorphisms (MNPs), insertions (ins), deletions (del), and complex variations defined by a  
279 combination of SNPs and MNPs. We were particularly interested in nucleotide polymorphisms  
280 potentially associated with variation in competitiveness or BNF capacity of the strains **(Table 1)**.

281 When comparing the sequencing data of the *B. japonicum* strains to the reference strain  
282 CPAC 15, a total of 1,150 unique variations were detected. These include 828 SNPs, 21 MNPs, 59  
283 insertions, 89 deletions, and 153 complex variations. Of these, 924 are in protein-coding sequences  
284 and 226 in intergenic regions. Excluding synonymous mutations as these are unlikely to have  
285 biological effects, 71 variations were detected within genes or intergenic regions of SI A and 66  
286 variations in SI C; no variations were observed in SI B. The variations within the SIs that we predict  
287 might be related to competitiveness or BNF are presented in **Table 3**.

288 The strains of the *B. diazoefficiens* group are very closely related, and this conservation is  
289 also reflected in the number of SNPs. Within this group, we detected only 57 variations: 24 SNPs,  
290 32 deletions, and one insertion. Of these, 48 are in protein-coding sequences, and nine are in

291 intergenic regions. No MNP or complex variations were identified. Six of the nucleotide variations  
292 were detected within SI A, while no variations were observed in SI B or SI C. The variations that  
293 we predict might influence the competitiveness or BNF capacity of these strains are shown in **Table**  
294 **4**.

295

296

## DISCUSSION

297 Commercial cropping of soybean began in the southern region of Brazil in the 1950s-1960s, and  
298 spread to the Cerrado biome in the central-western region in the 1970s (Hungria and Mendes,  
299 2015). Nowadays, Brazil is the world leader in soybean production, with this production depending  
300 on BNF rather than N-fertilizer. The success of BNF in Brazil is due to a long-term program in  
301 isolating and selecting highly effective and competitive *Bradyrhizobium* strains adapted to the  
302 Brazilian edaphoclimatic conditions and soybean genotypes. *B. japonicum* CPAC 15 and *B.*  
303 *diazoefficiens* CPAC 7 represent 90% of the inoculants currently used in Brazil and have been used  
304 since 1992 (Hungria and Mendes, 2015). CPAC 15 is a natural variant of SEMIA 566 (=CNPSo  
305 17) that was isolated from an area of Brazil that had been cropped with soybean and inoculated  
306 with CNPSo 17 for more than a decade (Vargas et al., 1992; Hungria and Mendes, 2015). CPAC 7  
307 is a natural variant of SEMIA 586 (=CNPSo 10, =CB 1809), which was isolated following a  
308 greenhouse study followed by 2-3 years of adaptation to Cerrado soils (Vargas et al., 1992; Hungria  
309 and Mendes, 2015).

310 In addition to CPAC 15 and CPAC 7, other CNPSo 17 and CNPSo 10 variants were  
311 obtained using the same approaches (Boddey and Hungria, 1997). Previous studies have confirmed  
312 the parenthood of the variants via rep-PCR profiles (Hungria et al., 1998; Barcellos et al., 2007;  
313 Santos et al., 1999), and have identified differences in the phenotypic and symbiotic properties of  
314 the variant strains (Boddey and Hungria, 1997; Hungria et al., 1998; Santos et al., 1999; Barcellos

315 et al., 2007). Within the *B. japonicum* group, strains CNPSo 22, CNPSo 23, CNPSo 24, CNPSo  
316 29, CNPSo 31, and CNPSo 34 are more competitive than CPAC 15, while CNPSo 17 and CNPSo  
317 38 show similar competitiveness (**Table 1**) (Hungria et al., 1998). Concerning the *B. diazoefficiens*  
318 group, the variants CNPSo 104 and CNPSo 108 show higher BNF capacity than CPAC 7, while  
319 CNPSo 105 shows lower BNF capacity, and CNPSo 10 and the other variants display similar BNF  
320 capacity to CPAC 7 (**Table 1**) (Santos et al., 1999). Previous studies attempted to identify genes  
321 possibly associated with the differences in symbiotic abilities based solely on the genomes or  
322 proteomes of CPAC 15, CPAC 7, and the corresponding species type strains (Siqueira et al., 2014;  
323 Batista et al., 2010), and more recently, differences in the symbiotic island were examined using  
324 draft genome assemblies of the parental strains and a subset of the variants (Bender et al., 2022).  
325 We build upon those studies by describing and comparing the complete or high-quality draft  
326 genomes of the parental, reference, and variant strains of both groups.

327

### 328 **Symbiotic Island organization**

329 The Cerrado soils are likely a challenging environment due to the high temperatures, long dry-  
330 season periods, low pH and nutrient availability, and high aluminum content (Hungria and Mendes,  
331 2015). Consequently, these soils may select for broad genetic and metabolic diversity. HGT is  
332 essential for the dissemination of selective advantages and evolution of symbiotic BNF ability  
333 among rhizobia, and it contributes to variation in rhizobium-legume symbioses. The symbiotic  
334 genes of *Bradyrhizobium* species are usually clustered in symbiotic islands (SIs) located on the  
335 chromosome (Ormeño-Orrillo and Martínez-Romero, 2019). Previous work with type strains  
336 suggested that the SIs of *B. diazoefficiens* and *B. japonicum* are split into three segments (SIs A,  
337 B, and C) with different sizes and locations, and it was suggested this is the result of a larger ancient  
338 SI being integrated into the chromosome and then rearranged into separate segments (Kaneko et

339 al., 2002; Kaneko et al., 2011). These same three regions were also identified in the chromosome  
340 of *B. japonicum* CPAC 15 and *B. diazoefficiens* CPAC 7 (Siqueira et al., 2014), as well as in all  
341 variant and parental strains included in our study.

342 Consistent with past studies, we observed that SI A contains most of the classical genes  
343 required for symbiotic nitrogen fixation. SI A is integrated into a tRNA-valine gene, which is the  
344 most common insertion site in bradyrhizobia (Weisberg et al., 2022). SI A carries the *nif* genes  
345 encoding proteins responsible for synthesizing and regulating nitrogenase, as well as the *fix* genes  
346 involved in oxygen metabolism. SI A also carries the classical genes required for the nodulation  
347 process, which include the *nod*, *noe*, and *nol* genes. In addition, this symbiotic island carries *rhc*  
348 and *nop* clusters that encode a T3SS and T3SS effectors (T3Es), respectively, that are involved in  
349 other steps of nodulation or alternative nodulation processes (Teulet et al., 2022). The presence of  
350 T3SS and T3E genes on the SI of bradyrhizobia has been frequently described (Okazaki et al.,  
351 2015; Weisberg et al., 2022), with Teulet et al. (2020) noting that 90% of *Bradyrhizobium* genomes  
352 with *nod* genes also encode a T3SS, inferring a common evolutionary origin for both gene groups  
353 in this genus. In both the *B. japonicum* and *B. diazoefficiens* groups, the *rhc* and *nop* clusters of all  
354 strains correspond to  $\alpha$ -RhcI, commonly found in *Nitrobacteraceae* (Teulet et al., 2020).

355

### 356 ***B. japonicum* plasmids**

357 Although plasmids are unusual in the genus *Bradyrhizobium*, there are some reports of their  
358 occurrence. Cyntrin et al. (2008) sequenced the plasmid of the photosynthetic *Bradyrhizobium* sp.  
359 BTAi1, a strain able to nodulate aquatic legumes of the genus *Aeschynomene* with no requirement  
360 of *nod* genes. Also, up to three plasmids were detected in five *B. japonicum* strains and six *B.*  
361 *elkanii* strains from China, Thailand, and the United States of America (Cyntrin et al., 2008).  
362 Whole-genome sequencing carried out by Iida et al. (2015) showed that *B. diazoefficiens* NK6,



363 isolated from root nodules of soybean grown in paddy fields in Niigata (Japan), contains four  
364 plasmids (pNK6a, pNK6b, pNK6c and pNK6d), and five other *Bradyrhizobium* strains had  
365 plasmids detected by pulsed-field gel electrophoresis. Ormeño-Orrillo and Martínez-Romero  
366 (2019), in a study including hundreds of *Bradyrhizobium* genomes, revealed that 35 contained at  
367 least one copy of the *repB* gene, indicative of a plasmid. Lastly, *Bradyrhizobium* sp. DOA9 is  
368 unique in that its symbiotic genes are found on a symbiotic plasmid rather than on a chromosomal  
369 SI; the DOA9 symbiotic plasmid includes nodulation, nitrogen fixation, T3SS, and type IV (T4SS)  
370 secretion system genes (Okazaki et al., 2015).

371 We detected a monophyletic group of five *B. japonicum* variants that each carried two  
372 plasmids. Both plasmids were annotated as encoding a number of toxin-antitoxin (TA) systems.  
373 These include a putative MazE/MazF TA system, a VapC toxin, and a Phd/YefM antitoxin on  
374 plasmid “a”. Similarly, plasmid “b” putatively encodes two VapC family toxins, one VapB family  
375 antitoxin, one Phd/YefM family antitoxin, and two nucleotidyl transferase AbiEii/AbiGii toxin  
376 family proteins. In addition to functioning as plasmid addition systems, TA systems may also  
377 contribute to stress responses, having been linked to cell dormancy, drug-tolerant persister cells,  
378 survival during infection, adaptation to hostile environments, and biofilm formation (Schuster and  
379 Bertram, 2013; Chen et al., 2021). Interestingly, in *Sinorhizobium meliloti*, a VapB/VapC TA  
380 system was implicated in cell growth during symbiotic infection (Arcus et al., 2011). It is tempting  
381 to speculate the TA systems of plasmid “a” may contribute to stress tolerance or impact legume  
382 symbiosis.

383 Plasmid “a” carries a T3SS gene cluster that shows only 59% similarity with the T3SS  
384 genes of SI A. Other studies also reported the presence of multiple T3SS gene clusters in rhizobia,  
385 suggesting that they might be related to host specificity and competitiveness, although further  
386 research is required (Teulet et al., 2020, 2022). Although plasmid “b” did not carry genes for a

387 T3SS apparatus, we did detect genes encoding possible T3SS effectors including a C48 family  
388 peptidase, an E3 ubiquitin-protein ligase, and a hypothetical protein with an E3 ubiquitin  
389 transferase SlrP conserved domain.

390 Plasmid “a” was also annotated as encoding a HlyD family efflux protein. HlyD belongs to  
391 the resistance, nodulation, and cell division (RND) family of efflux transporters. Efflux transporters  
392 function as pumps to expel antimicrobial compounds, heavy metals, lipooligosaccharides, proteins,  
393 small molecules, and divalent metal cations, and help bacteria to survive in hostile environments.  
394 In *Escherichia coli*, HlyD is responsible for secreting hemolysin in pathogenic infections  
395 (Zgurskaya and Nikaido, 2000). Likewise, we detected genes putatively encoding efflux  
396 transporter proteins on plasmid “b”, including two HlyD family secretion periplasmic adaptor  
397 subunit, and a HlyB protein family. It is possible that these efflux proteins improve the  
398 competitiveness of bradyrhizobia, by increasing resistance to antimicrobial compounds produced  
399 by other soil microbes or during the symbiotic association with legumes (Maximiano et al., 2021).

400 Several other proteins related to stress responses were identified on the plasmids, all of  
401 which may help bradyrhizobia better survive the challenging conditions faced in Cerrado soils.  
402 Plasmid “a” carries a gene putatively encoding a molecular chaperone (HtpG), while plasmid “b”  
403 carries genes putatively encoding a cold-shock protein of the CspA family, a GroEL chaperonin,  
404 and the co-chaperone GroES. The chaperone HtpG is a heat shock protein involved in maintaining  
405 protein-folding homeostasis in *E. coli* under high-temperature conditions (Thomas and Baneyx,  
406 2000), and was up-regulated during salt stress in *Rhizobium tropici* (Maximiano et al., 2021). The  
407 CspA family includes RNA chaperones responsible for regulating the expression of target genes  
408 during temperature downshifts (Alexandre and Oliveira, 2013). GroEL and its cofactor GroES  
409 represent a chaperone system constitutively expressed under normal conditions and is important  
410 for bacterial protein folding by creating a hydrophilic environment. These proteins are upregulated

411 in heat stress conditions, preventing protein denaturation (Alexandre and Oliveira, 2013).  
412 *Bradyrhizobium* strains often carry *groEL-groES* operons; Batista et al. (2010) detected two spots  
413 of GroEL proteins in the *B. japonicum* CPAC 15 proteome, while Gomes et al. (2014) found GroEL  
414 spots in the *B. diazoefficiens* CPAC 7 proteome.

415 In addition to the chaperones, plasmid “a” putatively encodes a trehalose-6-phosphate  
416 synthase (OtsA), while plasmid “b” putatively encodes a choline dehydrogenase (BetA).  
417 Trehalose-6-phosphate synthases are involved in the biosynthesis of trehalose, a nonreducing  
418 disaccharide involved in bacterial tolerance against desiccation, heat, cold, oxidation, and osmotic  
419 stresses (Ledermann et al., 2021). OtsA orthologs have been linked to enhanced nodule occupancy  
420 competitiveness of *B. diazoefficiens* via improved osmotic tolerance in the early stages of soybean  
421 nodulation (Sugawara et al., 2009; Ledermann et al., 2021). Similarly, OtsA was linked to both  
422 free-living osmoadaptation in *S. meliloti* and competitiveness for alfalfa nodulation (Domínguez-  
423 Ferreras et al., 2009). Likewise, BetA is involved in osmoadaptation through production of the  
424 osmoprotectant glycine betaine, and its disruption in *S. meliloti* prevents this organism from using  
425 environmental choline as an osmoprotectant (Pocard et al., 1997). The *S. meliloti bet* operon is also  
426 highly induced in alfalfa nodules (Mandon et al., 2003). Considering the edaphoclimatic conditions  
427 of the Cerrado region, which has year-round high temperatures and long dry-season periods that  
428 could result in osmotic stresses, the plasmid-encoded chaperons, OtsA, and BetA may improve the  
429 fitness of bradyrhizobia in Cerrado soils.

430 We also detected a putative O-antigen biosynthesis gene cluster on plasmid “b”, which  
431 could impact the O-antigen structure of the variants carrying this plasmid. The O-antigen comprises  
432 repeating oligosaccharides units, and together with lipid A and the core oligosaccharide, composes  
433 the lipopolysaccharides (LPS) of Gram-negative bacterial cell walls. O-antigens are structurally  
434 diverse and are essential for bacteria-host interactions, by suppressing host defenses. We identified

435 a full pathway for the production of dTDP-L-rhamnose, a common component of bacterial O-  
436 antigens. In addition, we identified two glycosyltransferase family-2 proteins, two  
437 glycosyltransferase family-4 proteins, an ABC transporter permease, an ABC transporter ATP-  
438 binding protein, two glycosyltransferases, and an acetyltransferase that may also be related to O-  
439 antigen biosynthesis (Reeves et al., 1996).

440 Overall, we hypothesize that plasmids “a” and “b” may provide adaptative advantages to  
441 the strains carrying these mobile elements under the hostile conditions faced in Cerrado soils. By  
442 improving their saprophytic ability in the soil, the strains would also be more competitive for  
443 nodule occupancy.

444

#### 445 **Variation in the gene content of the symbiotic islands**

446 Whole genome alignments indicated high conservation of gene order across the chromosomes  
447 within the *B. japonicum* and *B. diazoefficiens* genomes. Although we detected the same possible  
448 inversion in *B. japonicum* CPAC 15 and CNPSo 22 (which are not sister taxa), this may instead  
449 reflect assembly errors as these were the only two genomes not assembled using Flye. Similarly,  
450 the SIs A, B, and C of *B. japonicum* and *B. diazoefficiens* were also highly syntenic within each  
451 group, despite these regions being enriched for IS and transposase genes (Barros-Carvalho et al.,  
452 2018).

453 To further evaluate how genomic variation may be correlated with the phenotypic  
454 differences of the variants, pangenome analyses were performed to identify variation in gene  
455 content across strains. We focused on variations in SI A, as this region contains the primary genes  
456 required for symbiotic nitrogen fixation. The *B. japonicum* strains carrying plasmids have a SI A  
457 smaller than those that lack plasmids. This difference is driven by a contiguous region of ~50 genes  
458 present in the plasmidless strains, which is replaced by a set of 27 genes in the plasmid-containing

459 strains. In the strains lacking plasmids, about half of the 50 genes are annotated as hypothetical  
460 genes, while the others included genes encoding type II and type IV secretion systems proteins,  
461 oxidoreductases, transcriptional regulators, IS, and transposases (**Table S2**). In the plasmid-  
462 containing strains, the 27 genes include eight hypothetical genes, transposases, and genes encoding  
463 proteins that may influence their saprophytic ability, such as a cold shock protein, carbohydrate  
464 and peptide transport systems, and a LuxR-like transcriptional regulators (**Table S2**).

465 A few other interesting differences were observed within the *B. japonicum* group (**Table**  
466 **S2**). The parental strain CNPSo 17 appears to have lost a NoeE-like protein, which is a  
467 sulfotransferase related to modifications in the Nod factors and host specificity (Wang et al., 2019).  
468 Interestingly, CNPSo 38, which is less competitive than most variants of the *B. japonicum* group,  
469 gained a gene putatively encoding a second copy NopM, an effector protein secreted by the T3SS  
470 and that is related to negative effects in the interaction with legumes (Kambara et al., 2009). On  
471 the other hand, no gain or loss of a specific gene that might explain the higher competitiveness of  
472 CNPSo 22, CNPSo 23, CNPSo 24, CNPSo 29, CNPSo 31, and CNPSo 34 from the *B. japonicum*  
473 group was identified.

474 Likewise, several interesting differences were observed within the *B. diazoefficiens* group  
475 within SI A (**Table S3**). CNPSo 106, a variant with equal BNF capacity and competitiveness to  
476 CPAC 7, lost a gene coding for acetyltransferase containing a GNAT domain. Acetyltransferases  
477 are involved in Nod factors biosynthesis (Wang et al., 2019) and, recently, a GNAT  
478 acetyltransferase was identified as related to competitiveness for *Pisum sativum* in *R.*  
479 *leguminosarum* bv. *viciae* (Boivin et al., 2019). In addition, CNPSo 106 may have lost putative  
480 *nopM* and a *bacA*-like genes. The negative impact of *nopM* was described above, while *bacA* and  
481 *bclA* (*bacA*-like) encode peptide transporters essential for symbiosis with legumes that produce  
482 nodule-specific cysteine-rich (NCR) peptide, but not for symbiosis with legumes such as soybean

483 that do not produce NCR peptides (Glazebrook et al., 1993; Karunakaran et al., 2010; Guefrachi et  
484 al., 2015). Interestingly, CNPSo 104, the most competitive and efficient nitrogen-fixer of this  
485 group, appears to have lost nine genes encoding five transposases, three hypothetical proteins, a  
486 sulfite exporter TauE/SafE family protein, and a sulfurtransferase important to sulfur and carbon  
487 cycles, while gaining two hypothetical genes and two putative transposases. We did not observe  
488 any obvious gene gains or losses in SI A related to the higher BNF capacity of CNPSo 104 and  
489 CNPSo 108 compared to the rest of the *B. diazoefficiens* group.

490

#### 491 **Nucleotide variations within SI A of the *B. japonicum* group**

492 In addition to examining variation in gene presence/absence, we compared the genomes of the  
493 variant and parental strains to identify nucleotide sequence variations potentially associated with  
494 differences in BNF efficiency or competitiveness for nodule occupancy. Recently, Bender et al.  
495 (2022) analyzed SNPs in the SI A of some of the same strains used in our study; while some SNPs  
496 were detected in both studies, others were not, likely as we included more strains, used complete  
497 genomes, and used different annotation and analysis tools.

498 Several interesting nucleotide polymorphisms were detected within SI A of the *B.*  
499 *japonicum* group of strains. We detected a SNP in a gene encoding an AbiEi family antitoxin found  
500 only in the parental strain CNPSo 17, which has equal competitiveness but lower BNF capacity  
501 than CPAC 15 (**Table 1**). A study by Chen et al. (2021) demonstrated that mutation of the *abiEi*  
502 antitoxin gene of *Mesorhizobium huakuii* did not alter the number of nodules but strongly affected  
503 bacteroid occupancy and BNF efficiency. In addition, 21 genes directly related to symbiotic BNF  
504 were up- or down-regulated in the transcriptome of the *M. huakuii* *abiEi* mutant. We therefore  
505 hypothesize that the nucleotide variation detected in *abiEi* might negatively affect the BNF  
506 capacity of the parental strain.

507 Strain CNPSo 22 contained a unique SNP in a hypothetical gene containing a conserved  
508 domain of the extra-cytoplasmic function (ECF)  $\sigma$  factor of the *rpoE* gene. The  $\sigma$  factors are  
509 ubiquitous in bacterial genomes and are involved in the control of gene expression by binding to  
510 RNA polymerase. A putative ECF  $\sigma$  factor of *S. meliloti* is associated with several stress conditions  
511 including heat and salt stress, as well as carbon and nitrogen starvation (Sauviac et al., 2007). In  
512 addition, Martínez-Salazar et al. (2009) suggested that *rpoE4* of *Rhizobium etli* is a general  
513 regulator involved with saline and osmotic responses, oxidative stress, and cell envelope  
514 biogenesis. Gourion et al. (2009) showed that *B. diazoefficiens* USDA 110<sup>T</sup> ECF  $\sigma$  factor mutants  
515 are more sensitive to heat and desiccation upon carbon starvation than the wild type. In addition,  
516 mutants formed nodules with reduced number, size, and BNF capacity in association with *G. max*  
517 and *Vigna radiata*, suggesting that ECF  $\sigma$  factors are important for *Bradyrhizobium* symbiosis  
518 (Gourion et al., 2009). Considering that CNPSo 22 is a highly competitive variant, we hypothesize  
519 that the nucleotide variation in the ECF  $\sigma$  factor gene of SI A may be a contributing factor.

520 Strain CNPSo 24 has higher competitiveness and efficiency of BNF than CPAC 15, and it  
521 contains a unique SNP on in a gene encoding a DUF1521 domain-containing a protein homolog to  
522 the T3E NopE1. Zenher et al. (2008) detected NopE1 in mature *Macroptilium atropurpureum*  
523 nodules hosting *B. japonicum* associated, indicating a putative function of this effector in rhizobia-  
524 legume symbiosis. Wenzel et al. (2010) also identified NopE1 in nodules and showed that mutation  
525 of *B. japonicum nopE1* and its homolog, *nopE2*, results in a reduced number of nodules on *M.*  
526 *atropurpureum* and *G. max*. However, the same double mutant significantly increased the number  
527 of nodules in *V. radiata*, suggesting the impact is host specific (Wenzel et al., 2010). The DUF1521  
528 domain-containing protein of CNPSo 24 is located three genes downstream to several other *rhc*  
529 genes of SI A and thus may play a role in symbiotic BNF; however, whether this variation  
530 positively or negatively influences the symbiotic capacity of CNPSo 24 remains to be evaluated.

531 Strain CNPSo 34 presents higher competitiveness but lower BNF capacity than CPAC 15.  
532 CNPSo 34 contains an in-frame deletion in a gene encoding a PAS domain S-box protein.  
533 Prokaryotic PAS domains usually are part of two-component regulatory systems composed of a  
534 histidine kinase sensor and a response regulator. Several BNF and nodulation proteins have a PAS  
535 domain that serves as an oxygen and/or redox sensor, which are important for nitrogenase activity  
536 and energy metabolism, respectively (Taylor and Zhulin, 1999). Examples include FixL of the  
537 FixL/FixJ two-component system that detects environmental oxygen levels and regulates  
538 expression of BNF genes (Gilles-Gonzales and Gonzales, 1993). Besides FixL/FixJ, *Azorhizobium*  
539 *caulinodans* also has also the NtrY/NtrX two-component system; NtrY is a membrane-associated  
540 sensor with a PAS domain, which may be involved in sensing extracellular nitrogen levels (Taylor  
541 and Zhulin, 1999). NifU has a PAS domain at the N-terminus, possibly related to iron and sulfur  
542 mobilization for the iron-sulfur cluster of nitrogenase (Taylor and Zhulin, 1999). In addition, the  
543 *nodV/nodW* genes are involved in regulating the nodulation genes through flavonoid signals; NodV  
544 has four PAS domains (Taylor and Zhulin, 1999). Given that the focal PAS domain S-box protein  
545 is found within SI A, we hypothesize that it is also related to symbiosis, and that the in-frame  
546 deletion in CNPSo 34 contributes to its symbiotic phenotypes.

547 Strain CNPSo 38, with equal competitiveness and lower BNF capacity than CPAC 15,  
548 carried a unique SNP in *dctA*. The *dctA* gene is essential for symbiotic nitrogen fixation as it  
549 encodes a transporter responsible for transporting the C<sub>4</sub>-dicarboxylates malate, succinate, and  
550 fumarate, which are the primary carbon sources received by rhizobia in nodules (Ronson et al.,  
551 1984; Finan et al., 1983). Therefore, as *dctA* is essential for symbiotic nitrogen-fixation, the  
552 nucleotide variation within this gene may negatively impact the BNF capacity of CNPSo 38, and  
553 potentially also its saprophytic ability.

554 The monophyletic group of plasmid-carrying strains CNPSo 22, CNPSo 29, CNPSo 31,



555 CNPSo 34, and CNPSo 38 carry a SNP in a gene encoding a YopT-type cysteine protease, an  
556 effector protein usually found in the pathogenic bacteria *Pseudomonas syringae* and *Yersinia*  
557 (Kambara et al., 2009), and homologous to the T3E NopT. *S. fredii* NGR234 *nopT* mutants show  
558 improved nodulation with *Phaseolus vulgaris* and *Tephrosia vogelii*, and are negatively impacted  
559 in their association with *Crotalaria juncea* (Kambara et al., 2009). Conversely, *Bradyrhizobium*  
560 *vignae* ORS3257 *nopT* mutants form fewer nodules on *V. unguiculata* and *V. mungo* (Songwattana  
561 et al., 2021). We therefore hypothesize that the SNP in the gene encoding a YopT-type cysteine  
562 protease may impact nodulation and deserves further studies. Interestingly, this group of strains  
563 also contain a SNP located in *nolY* encoding an isoflavone *nodD*-dependent protein related to  
564 infection events. *B. diazoefficiens* USDA 110<sup>T</sup> *nolY* mutants show a slight nodulation defect on *G.*  
565 *max*, *M. atropurpureum*, and *V. unguiculata*, and a severe nodulation defect on *V. mungo*  
566 (Dockendorff et al., 1994). These five variant strains also carry SNPs in two genes related to  
567 nitrogenase biosynthesis, *nifS* and *nifE*. NifS is a cysteine desulfurase involved in donating sulfur  
568 for the FeS metallocluster of Fe-protein of nitrogenase (Ludden, 1993). NifE participates in the Fe-  
569 Mo-co metallocluster synthesis of the MoFe-protein of nitrogenase, along with the *nifB*, *nifH*, *nifN*,  
570 *nifQ*, and *nifV* genes (Kennedy and Dean, 1992). These two SNPs were also detected in CNPSo 22  
571 and CNPSo 38 by Bender et al. (2022) and could impact the BNF efficiency of these variant strains.

572 All variants with plasmids and the parental strain CNPSo 17 carry a SNP in an intergenic  
573 region 65 bp upstream of a gene encoding the nodule efficiency protein C (*nfeC*) of SI A. The  
574 nodule efficiency proteins were first identified in *S. meliloti* GR4 and are associated with improved  
575 nodulation efficiency and competitiveness with *Medicago* (Sanjuan and Olivares, 1989). Similarly,  
576 deletion of *nfeC* in *B. diazoefficiens* USDA 110<sup>T</sup> resulted in delayed nodulation on soybean and  
577 reduced competitiveness for nodule occupancy (Chun and Stacey, 1993). This group of strains also  
578 have a SNP in an intergenic region 132 bp upstream of a gene encoding an electron transfer

579 flavoprotein alpha subunit FixB family protein in SI A. In addition to *nod* and *nif* genes, the *fix*  
580 genes are important to BNF as they encode electron transfer proteins that function under  
581 microaerobic conditions (Earl et al., 1987). The nucleotide variations upstream of *nfeC* and *fixB*  
582 may alter their expression and consequently impact nodulation and nitrogen fixation, respectively.

583         The reference strain CPAC 15 has a unique SNP in a gene putatively encoding a C48-family  
584 peptidase. Young et al. (2010) suggested that the Bll8244 protein of *B. diazoefficiens* USDA 110<sup>T</sup>,  
585 a homolog of C48-family peptidases, functions as a genistein secreted T3E protein. The C48-family  
586 protein of our focal strains contains a conserved domain of small ubiquitin-like modifier (SUMO)  
587 proteases, the main effector family found in the genus *Bradyrhizobium* (Teulet et al., 2020).  
588 Moreover, a SUMO domain was identified in a putative effector protein of *B. japonicum* Is-34 that  
589 is responsible for the inability of this strain to nodulate the soybean *Rj4* genotype (Tsurumaru et  
590 al., 2010). Consequently, we hypothesize that the SNP in the focal gene encoding a C48-family  
591 peptidase in CPAC 15 may impact competitiveness and nodulation, and, therefore, it should be  
592 carefully investigated in further studies.

593

#### 594 **Nucleotide variations within SI A of the *B. diazoefficiens* group**

595 The reference strain CPAC 7 carried three interesting nucleotide polymorphisms in SI A compared  
596 to the rest of the *B. diazoefficiens* strains. CPAC 7 contained a one nucleotide insertion 108 bp  
597 upstream to *nfeC*. As discussed above, *nfeC* is related to nodulation and competitiveness of  
598 rhizobia. We hypothesize that the nucleotide insertion may impact expression, and thus  
599 competitiveness, of CPAC 7. CPAC 7 also contains a one nucleotide frameshift insertion in a gene  
600 putatively encoding a pentapeptide repeat-containing protein homologous to YjbI, a truncated  
601 hemoglobin of *Bacillus subtilis*. Rogstam et al. (2007) demonstrated that a *B. subtilis* *yjbI* mutant  
602 is hypersensitive to sodium nitroprusside, a source of nitric oxide. Therefore, the CPAC 7 variation

603 within *yjbl* of the *B. diazoefficiens* group may impact the saprophytic ability of the strains. Lastly,  
604 CPAC 7 contains a one nucleotide frameshift insertion in a gene putatively encoding a N-  
605 acetyltransferase GNAT family. As N-acetyltransferases may promote modifications of Nod  
606 factors (Wang et al., 2019), this mutation could impact competitiveness for nodulation and host  
607 specificity.

608

## 609 **Conclusions**

610 Using whole genome sequencing and comparative genomic methodologies, we identified  
611 numerous genomic differences across the *B. japonicum* and *B. diazoefficiens* variants. Overall, a  
612 higher amount of variability was found within the *B. japonicum* strains compared to the *B.*  
613 *diazoefficiens* group. Interestingly, we detected a remarkable diversity of mobile elements in the  
614 *B. japonicum* group, with a high number of insertion sequences that may have contributed to  
615 genome rearrangements and HGT. The *B. japonicum* group has a comparatively large pangenome,  
616 and a total of 1,150 nucleotide polymorphisms were detected across the strains, including 71 non-  
617 synonymous variations within SI A. In addition, a monophyletic group of five *B. japonicum*  
618 variants unexpectedly carry two plasmids, with several of the plasmid-encoded genes putatively  
619 associated with tolerance to environmental stresses. Less variation was observed in the *B.*  
620 *diazoefficiens* group. The chromosomes and SIs were highly syntenic, and a smaller pangenome  
621 was detected in comparison to the *B. japonicum* group. In total, only 57 nucleotide polymorphisms  
622 were detected, of which only six are located in SI A. No plasmids were detected in the *B.*  
623 *diazoefficiens* strains. The large difference in level of genetic variability of the two groups likely  
624 results from how the variants were originally isolated. The *B. japonicum* variants were isolated as  
625 highly competitive variants following more than ten years of growth of CPAC 15 in Cerrado soils.  
626 In contrast, the *B. diazoefficiens* variants were selected as strains with high BNF capacity and were

627 selected based colony morphological differences followed by only a few years of adaptation to  
628 Cerrado soils (Hungria and Mendes, 2015).

629 In conclusion, we identified numerous genetic variations – including gene gains/losses,  
630 plasmid acquisition, and nucleotide polymorphisms – across natural variants of the soybean  
631 inoculants *B. japonicum* CNPSo 17 and *B. diazoefficiens* CNPSo 10, highlighting the high  
632 plasticity of *Bradyrhizobium* genomes. The level of genetic variability correlated with the length  
633 of time the parental strains were allowed to adapt to their new environment. We hypothesize that  
634 many of the genetic variations reflect early adaptation to the stressful conditions of Cerrado soils  
635 that might improve saprophytic ability, or that alter competitiveness or BNF capacity with local  
636 soybean genotypes. In general, single genomic differences able to explain the phenotypic  
637 differences of the variants were not obvious, suggesting that the observed alterations in  
638 competitiveness for nodule occupancy and BNF capacity may instead reflect the cumulative impact  
639 of multiple genomic variations.

640

## 641 MATERIALS AND METHODS

### 642 *Bradyrhizobium* strains

643 This study examined 18 *Bradyrhizobium* strains, nine belonging to the species *B. japonicum* and  
644 nine to the species *B. diazoefficiens*. For each species, the strains included one parental genotype  
645 previously used as a commercial inoculant in Brazil, one natural variant (the reference genome)  
646 used in commercial inoculants from 1992 until the present, and seven other natural variants. The  
647 strains used in this study, as well as their BNF and competitiveness capacities, are shown in **Table**  
648 **1**. The parenthood of the strains within each group was confirmed by their BOX-PCR profiles  
649 (**Figure S3**). The background of the strains is detailed in the discussion. All strains are deposited

650 in the ‘Diazotrophic and Plant Growth Promoting Bacteria Culture Collection of Embrapa  
651 Soybean’ (WFCC Collection # 1213, WDCM Collection # 1054), Londrina, Paraná State, Brazil.

652

### 653 **DNA extraction and genome sequencing**

654 A high-quality draft genome of CPAC 15 was previously sequenced by Siqueira et al. (2014) and  
655 was retrieved from the National Center of Biotechnology Information (NCBI; GenBank accession  
656 CP007569). Draft genomes of strains CNPSO 17, CNPSO 22, CNPSO 23, CNPSO 38, CNPSO 10,  
657 CNPSO 104, CNPSO 105, and CNPSO 107 were previously reported by Bender et al., (2022) and  
658 their raw Illumina data was used in the process of completing their genomes in this study. All other  
659 strains were sequenced as part of this study. Strains were grown on a modified-yeast mannitol  
660 (YM) medium (Hungria et al., 2016) at 28°C for five days. The total DNA of each strain was  
661 extracted using the DNeasy Blood and Tissue kit (Qiagen), according to the manufacturer’s  
662 instructions.

663 Libraries for Illumina sequencing were prepared following the instructions of the Nextera  
664 XT kit (# 15031942 v01) and sequenced on a MiSeq instrument to generate 300 bp paired-end  
665 reads. ONT sequencing was performed using a Rapid Barcoding Kit (SQK-RBK004) and an R9.4.1  
666 flow cell on a minION device. ONT basecalling and demultiplexing were performed using Guppy  
667 version 5.011+2b6dbffa5 and the high accuracy model (ONT). Sequencing statistics are provided  
668 in **Table 2**.

669

### 670 **Genome assembly**

671 The quality of the Illumina reads was checked using the FASTQC tool  
672 ([bioinformatics.babraham.ac.uk/projects/fastqc/](http://bioinformatics.babraham.ac.uk/projects/fastqc/)). Subsequently, adapter sequences and low-  
673 quality bases were trimmed using trimmomatic version 0.39 (Bolger et al., 2014) with the

674 parameters: LEADING:3 TRAILING:3 SLIDINGWINDOW:4:15 MINLEN:36  
675 ILLUMINACLIP:NexteraPE.fa:2:30:10. The phiX sequences were removed using the  
676 run\_bowtie2\_subtract\_unmapped\_reads.pl script ([github.com/tomdeman-bio/Sequence-scripts](https://github.com/tomdeman-bio/Sequence-scripts))  
677 with the dependencies bowtie2 version 2.4.5 (Langmead et al., 2012) and samtools version 1.15.1-  
678 33-g906f657 (Danecek et al., 2021).

679 De novo genome assembly was performed using Flye version 2.9-b1768 (Kolmogorov et  
680 al. 2019) with the ONT reads. Assemblies were checked for overlaps between the two ends of a  
681 contig using NUCmer version 4.0.0rc1 (Kurtz et al., 2004), and if identified, one copy of each  
682 overlap was removed. The assemblies were first polished with the ONT reads using Racon version  
683 1.4.13 (Vaser et al., 2017) followed by Medaka version 1.4.1 ([github.com/nanoporetech/medaka](https://github.com/nanoporetech/medaka));  
684 read mapping was performed with Minimap2 version 2.20-r1061 (Li, 2018). The assemblies were  
685 then polished with the Illumina reads using Pilon version 1.24 (Walker et al., 2014) and Racon;  
686 read mapping was performed using bwa version 0.7.17-r1198-dirty (Li and Durbin, 2009).  
687 NUCmer was used again to check for overlaps between two ends of a contig, with one copy  
688 removed if found.

689 As Flye did not produce a fully circular chromosome for strains CNPSo 22 and CNPSo 38,  
690 *de novo* assembly was repeated using Unicycler version 0.5.0 (Wick et al., 2017) with both the  
691 ONT and Illumina reads. The Flye and Unicycler assemblies were then merged using the patch  
692 function of RagTag version 2.1.0 (Alonge et al., 2019). The procedure resulted in a circular  
693 chromosome for strain CNPSo 22, and the resulting assembly was used for downstream analyses.  
694 As this process did not improve the quality of the CNPSo 38 genome, we continued with the Flye-  
695 based assembly for subsequent steps.

696 Lastly, the assemblies were reoriented such that the chromosomes began at the putative  
697 origin of replication (Kaneko et al., 2011), using circlator version 1.5.5 with the fixstart option

698 (Hunt et al., 2015). The genome of *B. japonicum* CPAC 15 was similarly reoriented.

699

## 700 **Genome annotation**

701 Genome assemblies were annotated using the NCBI Prokaryotic Genome Annotation Pipeline  
702 (PGAP) program version 2022-02-10.build5872 (Tatusova et al. 2016). The symbiotic island (SI)  
703 regions A and B were detected as described by Weisberg et al. (2022), whereas SI region C was  
704 detected according to Kaneko et al. (2011).

705

## 706 **Genome assembly statistics and average nucleotide identity**

707 The quality of the genome assemblies was evaluated using the web-based tool QUAST: Quality  
708 Assessment Tool for Genome Assemblies (Gurevich et al., 2013). Pairwise average nucleotide  
709 identity (ANI) was calculated using FastANI version 1.33 with default parameters (Jain et al.,  
710 2018). For ANI calculations, the genomes of *B. japonicum* USDA 6<sup>T</sup> (GenBank accession  
711 NC\_017249.1) and *B. diazoefficiens* USDA 110<sup>T</sup> (Genbank accession NC\_004463.1) were  
712 downloaded from NCBI.

713

## 714 **Pangenome calculation**

715 Prior to pangenome analysis, the genome sequences were reannotated using Prokka version 1.14.6  
716 (Seemann, 2014) to produce GFF3 files compatible with Roary. The GFF3 files produced by  
717 Prokka were used as input for Roary version 3.11.2 (Page et al. 2015) using the default identity  
718 threshold of 95%. Pangenomes were calculated separately for each group of strains (*B. japonicum*  
719 and *B. diazoefficiens*). The pangenomes were visualized as UpSet plots using the R package  
720 UpSetR version 1.4.0 (Conway et al., 2017).

721

## 722 **Strain phylogenetic analysis**

723 A pangenome of all 18 strains, as well as of *B. japonicum* USDA 6<sup>T</sup> and *B. diazoefficiens* USDA  
724 110<sup>T</sup>, was constructed using Roary with the -e and -n options to produce a concatenated alignment  
725 of the 2,689 core genes; the alignment was produced using MAFFT version 7.310 (Kato and  
726 Standeley, 2013). The alignment was trimmed with trimAl version 1.4rev22 (Capella-Gutiérrez et  
727 al., 2009) with the automated1 option, and used to construct a maximum likelihood phylogeny with  
728 RAxML version 8.2.12 (Stamatakis, 2014), under the GTRCAT model with 1,000 bootstrap  
729 inferences. The phylogeny was visualized using iTOL (Letunic and Bork 2016).

730

## 731 **Nucleotide variant identification**

732 Single nucleotide polymorphisms (SNPs) and insertion/deletions (INDELs) were identified using  
733 Snippy version 4.6.0 ([github.com/tseemann/snippy](https://github.com/tseemann/snippy)) and the PGAP output, using CPAC 7 and  
734 CPAC 15 as the reference genomes. Polymorphisms located in intergenic regions were visualized  
735 with the Integrative Genomics Viewer (IGV) program version 2.11.9 (Robinson et al., 2011) to  
736 identify polymorphisms in the promoter regions of genes related to competitiveness, BNF capacity,  
737 and saprophytic ability. The protein sequences of genes upstream or downstream of the variation,  
738 as well as the protein sequences of genes located in the SIs containing variations, were annotated  
739 using the NCBI conserved domain database (CDD) version 3.17 (Lu et al., 2020) with the CD-  
740 search option (Marchler-Bauer and Bryant, 2004) to identify functional units in the protein  
741 sequences.

742

## 743 **Genome synteny analyses**

744 The genome sequences of the *B. japonicum* and *B. diazoefficiens* groups were compared using  
745 BLASTn from BLAST+ version 2.14.0 (Altschul et al., 1990) with the following parameters:



746 identity threshold of 98%, maximum number of high scoring pairs (HSP) of 200, and a minimum  
747 raw gapped score of 10,000. The output files were used as input for the Artemis Comparison Tool  
748 (ACT) version 18.2.0 (Carver et al. 2005) to visualize genome synteny. The SI A, B, and C of each  
749 group were selected using the program faidx version 0.7.2.1 according to the delimitations  
750 established by Weisberg et al. (2022) and Kaneko et al. (2010), and ACT comparisons were  
751 performed as described above.

752

### 753 **Data availability**

754 The genome assemblies of this study are available on NCBI BioProject database under the  
755 accessions numbers PRJNA1026581 for *B. japonicum* strains and PRJNA1026967 for *B.*  
756 *diazoefficiens* strains. PGAP and prokka annotations and code used for the analysis reported in this  
757 study are available on GitHub at [https://github.com/MSKlepa/Bradyrhizobium\\_variants](https://github.com/MSKlepa/Bradyrhizobium_variants).

758

## 759 **ACKNOWLEDGEMENTS**

760 We gratefully acknowledge Leonardo Araujo Terra for helpful bioinformatics advice, and Sabhjeet  
761 Kaur for assistance with the ONT sequencing. The group of M.H. is supported by the INCT project  
762 “Plant Growth-Promoting Microorganisms for Agricultural Sustainability, Environmental  
763 Responsibility” (CNPq 465133/2014-4, Fundação Araucária-STI 043/2019). Research in the  
764 G.C.D. laboratory is supported by a Natural Sciences and Engineering Research Council of Canada  
765 (NSERC) Discovery Grant. M.S.K acknowledges the Coordenação de Aperfeiçoamento de Pessoal  
766 de Nível Superior (CAPES), Finance Code 001, for the PDSE fellowship. M.S.K was further  
767 supported by a Mitacs Globalink Research Award and a scholarship from Fundação Araucária.

768

- 769 **LITERATURE CITED**
- 770 Alexandre A, Oliveira S. 2013. Response to temperature stress in rhizobia. *Crit Rev Microbiol.*  
771 39(3):219–228.
- 772 Alonge M, et al. 2019. RaGOO: fast and accurate reference-guided scaffolding of draft genomes.  
773 *Genome Biol.* 20:224.
- 774 Altschul SF, Gish W, Miller W, Myers EW, Lipman DJ. 1990. Basic local alignment search tool.  
775 *J Mol Biol.* 215:403–410.
- 776 Arcus VL, McKenzie JL, Robson J, Cook GM. 2011. The PIN-domain ribonucleases and the  
777 prokaryotic VapBC toxin-antitoxin array. *PEDS* 24(1–2):33–40.
- 778 Arnold BJ, Huang IT, Hanage WP. 2022. Horizontal gene transfer and adaptive evolution in  
779 bacteria. *Nat Rev* 20:206–218.
- 780 Barcellos FG, Menna P, Batista JSS, Hungria M. 2007. Evidence of horizontal transfer of symbiotic  
781 genes from a *Bradyrhizobium japonicum* inoculant strain to indigenous *Sinorhizobium*  
782 (*Ensifer*) *fredii* and *Bradyrhizobium elkanii* in a Brazilian savannah soil. *Appl Environ*  
783 *Microbiol.* 73(8):2635–2643.
- 784 Barros-Carvalho GA, Hungria M, Lopes FM, Van Sluys MA. 2018. Brazilian-adapted soybean  
785 *Bradyrhizobium* strains uncover IS elements with potential impact on biological nitrogen  
786 fixation. *FEMS Microbiol Lett.* 366:fnz046.
- 787 Batista JSS, Torres AR, Hungria M. 2010. Towards a two-dimensional proteomic reference map  
788 *Bradyrhizobium japonicum* CPAC 15: Spotlighting “hypothetical proteins”. *Proteomics.*  
789 10:3176–3189.
- 790 Bender FR, et al. 2022. Genetic variation in symbiotic islands of natural variant strains of soybean  
791 *Bradyrhizobium japonicum* and *Bradyrhizobium diazoefficiens* differing in competitiveness

792 and in the efficiency of nitrogen fixation. *Microb Genom.* 8:000795.

793 Boddey LH, Hungria M. 1997. Phenotypic grouping of Brazilian *Bradyrhizobium* strains which  
794 nodulate soybean. *Biol Fertil Soils.* 25:407–415.

795 Boivin S, et al. 2019. Host-specific competitiveness to form nodules in *Rhizobium leguminosarum*  
796 symbiovar viciae. *New Phytol.* 226: 555–568.

797 Bolger AM, Lohse M, Usadel B. 2014. Trimmomatic: a flexible trimmer for Illumina sequence  
798 data. *Bioinform.* 30:2114–2120.

799 Capella-Gutiérrez S, Silla-Martínez JM, Gabaldón T. 2009. trimAl: a tool for automated alignment  
800 trimming in large-scale phylogenetic analyses. *Bioinform.* 25:1972–1973.

801 Carver TJ, et al. 2005. ACT: Artemis Comparison Tool. *Bioinform.* 21(16)3422–3.

802 Cevallos MA, Cervantes-Rivera R, Gutiérrez-Ríos RM. 2008. The *repABC* plasmid family.  
803 *Plasmid* 60(1):19–37.

804 Chen X, et al. 2021. The *Mesorhizobium huakuii* transcriptional regulator AbiEi plays a critical  
805 role in nodulation and is important for bacterial stress response. *BMC Microbiol.* 21:245.

806 Chun JY, Stacey G. 1993. A *Bradyrhizobium japonicum* gene essential for nodulation  
807 competitiveness is differentially regulated from two promoters. *MPMI* 7(2):248–255.

808 Conway JR, Lex A, Gehlenborg N. 2017. UpSetR: an R package for the visualization of  
809 intersecting sets and their properties. *Bioinform.* 33(18):2938–2940.

810 Cyntryn EJ, Jitackorn S, Giraud E, Sadowsky MJ. 2008. Insights learned from pBTAi1, a 229-kb  
811 accessory plasmid from *Bradyrhizobium* sp. strain BTAi1 and prevalence of accessory  
812 plasmids in other *Bradyrhizobium* sp. strains. *The ISME Journal* 2:158–170.

813 Danecek P, Bonfield JK, Liddle J, Marchall J, Ohan V, Pollard MO, Whitwham A, Keane T,  
814 McCarthy SA, Davies RM, Li H. 2021. Twelve years of SAMtools and BCFtools. *GigaScience.*  
815 10(2):giab008.

- 816 Dockendorff TC, Sharma AJ, Stacey G. 1994. Identification and characterization of the *nolYZ*  
817 genes of *Bradyrhizobium japonicum*. MPMI 7(2):173–180.
- 818 Domínguez-Ferreras A, Soto MJ, Pérez-Arnedo R, Olivares J, Sanjuán J. 2009. Importance of  
819 trehalose biosynthesis for *Sinorhizobium meliloti* osmotolerance and nodulation of alfafa roots.  
820 J Bacteriol. 191(24):7490–7499.
- 821 Earl CD, Ronson CW, Ausubel FM. 1987. Genetic and structural analysis of the *Rhizobium meliloti*  
822 *fixA*, *fixB*, *fixC*, and *fixX* genes. J Bacteriol. 169(3):1127–1136.
- 823 Finan TM, Wood JM, Jordan CD. 1983. Symbiotic properties of C<sub>4</sub>-dicarboxylic acid transport  
824 mutants of *Rhizobium leguminosarum*. J Bacteriol. 154(3):1403–1413.
- 825 Gilles-Gonzales MA, Gonzales G. 1993. Regulation of the kinase activity of heme protein FixL  
826 from the two-component system *fixL/fixJ* of *Rhizobium meliloti*. JBC 268(22):16293– 16297.
- 827 Glazebrook J, Ichige A, Walker GC. 1993. A *Rhizobium meliloti* homolog of the *Escherichia coli*  
828 peptide-antibiotic transport protein SbmA is essential for bacteroid development. Genes &  
829 Development 7:1485–1497.
- 830 Gomes DF, et al. 2014. Proteomic analysis of free-living *Bradyrhizobium diazoefficiens*:  
831 highlighting potential determinants of a successful symbiosis. 15:643.
- 832 Gourion B, et al. 2009. The PhyR-σEcfG signalling cascade is involved in stress response and  
833 symbiotic efficiency in *Bradyrhizobium japonicum*. Mol Microbiol. 73(2):29–305.
- 834 Guefrachi I, Verly C, Kondorosi É, Alunni B, Mergaert P. 2015. Role of the bacterial *BacA* ABC-  
835 transporter in chronic infection of nodule cells by *Rhizobium* bacteria. In: de Bruijn FJ, editor.  
836 Biological Nitrogen Fixation. John Wiley & Sons, Inc. p. 315–324.
- 837 Gurevich A, Saveliev V, Vyahhi N, Tesler G. 2013. QUAST: quality assessment tool for genome  
838 assemblies. Bioinform. 29(8):1072–1075.
- 839 Herridge DF, Giller KE, Jensen ES, Peoples MB. 2022. Quantifying country-to-global scale

- 840 nitrogen fixation for grain legume II. Coefficients, templates and estimates for soybean,  
841 groundnut and pulses. *Plant Soil* 474:1–15.
- 842 Hughes D. 2000. Evaluating genome dynamics: the constraints on rearrangements within bacterial  
843 genomes. *Genome Biol.* 1(6): reviews0006.1–0006.8.
- 844 Hungria M, Boddey LH, Santos MA, Vargas MAT. 1998. Nitrogen fixation capacity and nodule  
845 occupancy by *Bradyrhizobium japonicum* and *B. elkanii* strains. *Biol Fertil Soils* 27:393–399.
- 846 Hungria et al. 2000. Isolation and characterization of new efficient and competitive bean  
847 (*Phaseolus vulgaris* L.) rhizobia from Brazil. *Soil Biol. Biochem.* 30:1515–1528.
- 848 Hungria M, Campo RJ, Souza EM, Pedrosa FO. 2010. Inoculation with selected strains of  
849 *Azospirillum brasilense* and *A. lipoferum* improves yields of maize and wheat in Brazil. *Plant*  
850 *Soil* 331:413–425.
- 851 Hungria M, Mendes I. 2015. Nitrogen fixation with soybean: the perfect symbiosis?. In: de Bruijn  
852 FJ, editor. *Biological Nitrogen Fixation*. John Wiley & Sons, Inc. pp. 1009-1023.
- 853 Hungria M, et al. 2016. Isolation and growth of growth of rhizobia. In: Howieson JG, Dilworth  
854 MJ, editors. *Working with Rhizobia*. Canberra: Australian Centre for International Agriculture  
855 Reserch. pp. 39–60.
- 856 Hunt M, et al. 2015. Circlator: automated circularization of genome assemblies using long  
857 sequencing reads. *Genome Biol.* 16:294.
- 858 Iida T, et al. 2015. Symbiosis island shuffling with abundant insertion sequences in the genomes  
859 of extra-slow-growing strains of soybean *Bradyrhizobia*. *Appl Environ Microbiol.*  
860 81(12):4143–4154.
- 861 Jain C, Rodriguez-R LM, Phillippy AM, Konstantinidis KT, Aluru S. 2018. High throughput ANI  
862 analysis of 90K prokaryotic genomes reveals clear species boundaries. *Nat Commun.* 9:5114.
- 863 Juhas M, et al. 2008. Genomic islands: tools of bacterial horizontal gene transfer and evolution.

- 864 FEMS Microbiol Rev. 33:376–393.
- 865 Kambara K, et al. 2009. Rhizobia utilize pathogen-like effector proteins during symbiosis. Mol  
866 Microbiol. 71(1):92–106.
- 867 Kaneko T, et al. 2002. Complete genomic sequence of nitrogen-fixing symbiotic bacterium  
868 *Bradyrhizobium japonicum* USDA110. DNA Res. 9:189–187.
- 869 Kaneko T, et al. 2011. Complete genome sequence of the soybean symbiont *Bradyrhizobium*  
870 *japonicum* strain USDA6<sup>T</sup>. Genes 2:763–787.
- 871 Karunakaran R, et al. 2010. BacA is essential for bacteroid development in nodules of Galegoid  
872 but not Phaseoloid, legumes. J Bacteriol. 192(11):2920–2928.
- 873 Katoh K, Standley DM. 2013. MAFFT multiple sequence alignment software version 7:  
874 improvements in performance and usability. Mol Biol Evol. 30(4): 772–780.
- 875 Kennedy C, Dean D. 1992. The *nifU*, *niPS* and *nifV* gene products are required for activity of all  
876 three nitrogenases of *Azotobacter vinelandii*. Mol Gen Genet. 231:494–498.
- 877 Kolmogorov M, Yuan J, Lin Y, Pevzner PA. 2019. Assembly of long, error-prone reads using  
878 repeat graphs. Nat Biotechnol. 37:540–546.
- 879 Kurtz S, et al. 2004. Versatile and open software for comparing large genomes. Gen Biol. 5:R12.1–  
880 R12.9.
- 881 Langmead B, Salzberg S. 2012. Fast gapped-read alignment with Bowtie 2. Nat Methods 9:357–  
882 359.
- 883 Ledermann R, et al. 2021. *Bradyrhizobium diazoefficiens* requires chemical chaperones to cope  
884 with osmotic stress during soybean infection. mBio e00390-21.
- 885 Letunic I, Bork P. 2016. Interactive tree of life (iTOL) v3: an online tool for the display and  
886 annotation of phylogenetic and other trees. Nucleic Acids Res. 44(W1): W242–W245.
- 887 Li H, Durbin R. 2009. Fast and accurate short read alignment with Burrows-Wheeler transform.

- 888 Bioinformatics 25(14):1754–1760.
- 889 Li H. 2018. Minimap2: pairwise alignment for nucleotide sequences. Bioinformatics 34(18):3094–  
890 3100.
- 891 Lu S, et al. 2020. CDD/SPARCLE: the conserved domain database in 2020. Nucleic Acids Res.  
892 48(D1):D265–D268.
- 893 Ludden PW. 1993. *Nif* gene products and their roles in nitrogen fixation. In: Palacios R, Mora J,  
894 Newton WE, editors. New Horizons in Nitrogen Fixation: Proceedings of the 9th International  
895 Congress on Nitrogen Fixation, Cancún, Mexico, December 6–12, 1992. Springer Dordrecht.  
896 p. 101-104.
- 897 Mandon K, et al. 2003. The *Sinorhizobium meliloti* glycine betaine biosynthetic genes (*betICBA*)  
898 are induced by choline and highly expressed in bacteroids. NPMI 16(8):709–719.
- 899 Marchler-Bauer A, Bryant SH. 2004. CD-Search: protein domain annotations on the fly. Nucleic  
900 Acids Res. 32:W327–W331.
- 901 Martínez-Salazar JM, Salazar E, Encarnación S, Ramírez-Romero MA, Rivera J. 2009. Role of the  
902 extracytoplasmic function sigma factor RpoE4 in oxidative and osmotic stress responses in  
903 *Rhizobium etli*. J Bacteriol. 191(13):4122–4132.
- 904 Maximiano MR et al. 2021. Proteome responses of *Rhizobium tropici* CIAT 899 upon apigenin  
905 and salt stress induction. Appl Soil Ecol. 159:103815.
- 906 Medini D, Donati C, Tettelin H, Massignani V, Rappuoli R. 2005. The microbial pan-genome. Curr  
907 Opin Genet Dev. 15:589–594.
- 908 Okazaki S, et al. 2015. Genome analysis of a novel *Bradyrhizobium* sp. DOA9 carrying a symbiotic  
909 plasmid. PLoS ONE 10(2):e0117392.
- 910 Ormeño-Orrillo E, Martínez-Romero E. 2019. A genomotaxonomy view of the *Bradyrhizobium*  
911 genus. Front Microbiol. 10:1334.

- 912 Page AJ, et al. 2015. Roary: rapid large-scale prokaryote pan genome analysis. *Bioinform.*  
913 31(22):3691–3.
- 914 Pocard JA, et al. 1997. Molecular characterization of the *bet* genes encoding glycine betaine  
915 synthesis in *Sinorhizobium meliloti* 102F34. *Microbiology* 143:1369–1379.
- 916 Reeves PR, et al. 1996. Bacterial polysaccharide synthesis and gene nomenclature. *Trends*  
917 *Microbiol.* 4(12):495–502.
- 918 Robinson JT, et al. 2011. Integrative genomics viewer. *Nat Biotechn.* 29(1):24–26.
- 919 Rogstam A, Larsson JT, Kjølgaard P, von Wachenfeldt C. 2007. Mechanisms of adaptation to  
920 nitrosative stress in *Bacillus subtilis*. *J Bacteriol.* 189(8):3063–3071.
- 921 Ronson CW, Astwood PM, Downie AJ. 1984. Molecular cloning and genetic organization of C4-  
922 dicarboxylate transport genes from *Rhizobium leguminosarum*. *J. Bacteriol.* 160(3):903–909.
- 923 Sanjuan J, Olivares J. 1989. Implication of *nifA* in regulation of genes located on a *Rhizobium*  
924 *meliloti* cryptic plasmid that affect nodulation efficiency. *J. Bacteriol.* 171(8):4154–4161.
- 925 Santos MA, Vargas MAT, Hungria M. 1999. Characterization of soybean *Bradyrhizobium* strains  
926 adapted to the Brazilian savanas. *FEMS Microbiol Ecol.* 30:261–272.
- 927 Sauviac L, Philippe H, Phok K, Bruand C. 2007. An extracytoplasmic function sigma factor acts  
928 as a general stress response regulator in *Sinorhizobium meliloti*. *J Bacteriol.* 189(11):4204–  
929 4216.
- 930 Schuster CF, Bertram R. 2013. Toxin–antitoxin systems are ubiquitous and versatile modulators  
931 of prokaryotic cell fate. *FEMS Microbiol Lett.* 340:73-85.
- 932 Seemann T. 2014. Prokka: rapid prokaryotic genome annotation. *Bioinform.* 30(14):2068–2069.
- 933 Siqueira AF, et al. 2014. Comparative genomics of *Bradyrhizobium japonicum* CPAC 15 and  
934 *Bradyrhizobium diazoefficiens* CPAC 7: elite model strains for understanding symbiotic  
935 performance with soybean. *BMC Genom.* 15(240):1–20.



- 936 Songwattana P, et al. 2021. Identification of type III effectors modulating the symbiotic properties  
937 of *Bradyrhizobium vignae* strain ORS3257 with various *Vigna species*. *Sci Rep.* 11:4874.
- 938 Stamatakis A. 2014. RAxML version 8: a tool for phylogenetic analysis and post-analysis of large  
939 phylogenies. *Bioinform.* 30(9):1312–1313.
- 940 Sugawara M, Cyntryn EJ, Sadowsky MJ. 2009. Functional role of *Bradyrhizobium japonicum*  
941 trehalose biosynthesis and metabolism genes during physiological stress and nodulation. *Appl*  
942 *Environ Microbiol.* 76(4):1071–1081.
- 943 Tatusova T, et al. 2016. NCBI prokaryotic genome annotation pipeline. *Nucleic Acids Res.*  
944 44(14):6614–6624.
- 945 Taylor BL, Zhulin IB. 1999. PAS domains: internal sensors of oxygen, redox potential, and light.  
946 *Microbiol Mol Biol Rev.* 63(2):479–506.
- 947 Telles TS, Nogueira MA, Hungria M. 2023. Economic value of biological nitrogen fixation in  
948 soybean crops in Brazil. *Environ Technol Innov.* 31:103158.
- 949 Tettelin H, Riley D, Cattuto C, Medini D. 2008. Comparative genomics: the bacterial pan-genome.  
950 *Curr Opin Microbiol.* 12:472–477.
- 951 Teulet A, Camuel A, Perret X, Giraud E. 2022. The versatile roles of type III secretion systems in  
952 rhizobium-legume symbioses. *Annu. Rev. Microbiol.* 76:45–65.
- 953 Teulet A, et al. 2020. Phylogenetic distribution and evolutionary dynamics of nod and T3SS genes  
954 in the genus *Bradyrhizobium*. *Microb. Genom.* 6(9):mgen000407.
- 955 Thomas JG, Baneyx F. 2000. ClpB and HtpG facilitate *de novo* protein folding in stressed  
956 *Escherichia coli* cells. *Mol Microbiol.* 36(6):1360–1370.
- 957 Tilman D, Balzer C, Hill J, Befort BL. 2011. Global food demand and the sustainable  
958 intensification of agriculture. *PNAS* 108(50):20260–20264.
- 959 Tsurumaru H, et al. 2010. A putative type III secretion system effector encoded by the

- 960 MA20\_12780 gene in *Bradyrhizobium japonicum* Is-34 causes incompatibility with *Rj4*  
961 genotype soybeans. 81:5812–5819.
- 962 United Nations, Department of Economic and Social Affairs, Population Division. 2017. World  
963 Population Prospects: The 2017 Revision, Key Findings and Advance Tables. Working Paper  
964 No. ESA/P/WP/248.
- 965 Vargas MAT, Mendes IC, Suhet AR, Peres JRR. 1992. Duas novas estipes de rizóbios para  
966 inoculação da soja. Planaltina: EMBRAPA-CPAC, 3 pp. [EMBRAPA-CPAC. Comunicado  
967 Técnico, 62].
- 968 Vaser R, Sović I, Nagarajan N, Šikić M. 2017. Fast and accurate de novo genome assembly from  
969 long uncorrected reads. *Genome Res.* 27(5):737–746.
- 970 Vernikos G, Medini D, Riley DR, Tettelin H. 2015. Ten years of pan-genome analysis. *Curr Opin*  
971 *Microbiol.* 23:148–154.
- 972 Walker BJ, et al. 2014. Pilon: An integrated tool for comprehensive microbial variant detection  
973 and genome assembly improvement. *PLOS one* 9(11):e112963.
- 974 Wang ET, Chen WF, Tian CF, Young JPW, Chen WX, editors. 2019. *Ecology and Evolution of*  
975 *Rhizobia*. Singapore: Springer Nature.
- 976 Weisberg AJ, et al. 2022. Pangenome evolution reconciles robustness and instability of rhizobial  
977 symbiosis. *mBio.* 13(3):1-16. 10.1128/mbio.00074-22
- 978 Wenzel M, Friedrich L, Göttfer M, Zehner S. 2010. The type III–secreted protein NopE1 affects  
979 symbiosis and exhibits a calcium-dependent autocleavage activity. *MPMI* 23(1):124–129.
- 980 Wick RR, Judd LM, Gorrie CL, Holt KE. 2017. Unicycler: Resolving bacterial genome assemblies  
981 from short and long sequencing reads. *PLoS Comput Biol.* 13(6): e1005595.
- 982 Young Y, Zhao J, Morgan RB, Ma W, Jiang T. 2010. Computational prediction of type III secreted  
983 proteins from gram-negative bacteria. *BMC Bioinform* 11:1–10.

- 984 Zenher S, Schober G, Wenzel M, Lang K, Göttfert M. 2008. Expression of the *Bradyrhizobium*  
985 *japonicum* type III secretion system in legume nodules and analysis of the associated *tts* box  
986 promoter. MPMI 21(8):1087–1093.
- 987 Zgurskaya HI, Nikaido H. 2000. Multidrug resistance mechanism: drug efflux across two  
988 membranes. Mol Microbiol. 37(2):219–225.
- 989

990

## FIGURE LEGENDS

991 **Figure 1.** Unrooted phylogeny of reference, parental, and variant strains of the *B. japonicum* and  
992 *B. diazoefficiens* groups. (a) A maximum likelihood phylogeny of all strains was prepared from a  
993 concatenated alignment of 2,689 core genes. The scale represents the mean number of nucleotide  
994 substitutions per site. Sub-trees of the (a) the *B. japonicum* and (b) the *B. diazoefficiens* groups are  
995 shown with a different branch length scale to better display the within-group relationships.  
996 Numbers at the nodes indicate the bootstrap values, based on 1,000 bootstrap replicates.

997

998 **Figure 2.** Genome-wide synteny analysis of the (a) *B. japonicum* and (b) *B. diazoefficiens* parental  
999 strains (CNPSo 17 and CNPSo 10), reference strains (CPAC 15 and CPAC 7), and other variants.  
1000 Pairwise genome alignments were performed, and homologous regions between pairs of genomes  
1001 are connected by red lines (if in the same orientation) or blue lines (if in the inverse orientation).

1002

1003 **Figure 3.** UpSet plot summarizing the pangenome of the reference, parental, and variant strains of  
1004 the (a) *B. japonicum* group or (b) *B. diazoefficiens* group. The set size shows the total number of  
1005 gene families in a given genome, while the intersect size shows the number of gene families  
1006 conserved across the indicated proteomes.

1007

1008 **Table 1.** Competitiveness and BNF capacity comparison between the parental strain (P) and the  
 1009 variant strains compared to the reference variant (R). Data from the CPAC 15 group was retrieved  
 1010 from Hungria et al. (1998), while data for the CPAC 7 group was retrieved from Santos et al.  
 1011 (1999).

|                                                                                 | Strains      | Synonym            | Competitiveness | BFN capacity |
|---------------------------------------------------------------------------------|--------------|--------------------|-----------------|--------------|
| <i>Bradyrhizobium japonicum</i><br>CPAC 15 (=SEMIA 5079,<br>CNPSo 7, DF 24) (R) | CNPSo 17 (P) | SEMIA 566, BR 40   | =               | <            |
|                                                                                 | CNPSo 22     | S340               | >               | <            |
|                                                                                 | CNPSo 23     | S370               | >               | >            |
|                                                                                 | CNPSo 24     | S372               | >               | >            |
|                                                                                 | CNPSo 29     | S478               | >               | >            |
|                                                                                 | CNPSo 31     | S490               | >               | <            |
|                                                                                 | CNPSo 34     | S516               | >               | <            |
|                                                                                 | CNPSo 38     | S204               | =               | <            |
| <i>Bradyrhizobium diazoefficiens</i><br>CPAC 7 (= SEMIA 5080,<br>CNPSo 6) (R)   | CNPSo 10 (P) | SEMIA 586, CB 1809 | <               | =            |
|                                                                                 | CNPSo 104    | CPAC 390           | >               | >            |
|                                                                                 | CNPSo 105    | CPAC 392           | <               | <            |
|                                                                                 | CNPSo 106    | CPAC 393           | =               | =            |
|                                                                                 | CNPSo 107    | CPAC 394           | =               | =            |
|                                                                                 | CNPSo 108    | CPAC 402           | =               | >            |
|                                                                                 | CNPSo 109    | CPAC 403           | =               | =            |
|                                                                                 | CNPSo 110    | CPAC 404           | <               | =            |

1012

1013 **Table 2.** Genome assembly statistics of the parental strain (P), the reference variant for the genome comparison (R), and other variant  
 1014 strains of the *B. japonicum* and *B. diazoefficiens* groups.

| Strain                                | GenBank accession number | Size (bp)  | Contigs | Number of plasmids | Coverage (-fold) | CDS with protein | Pseudogenes | ANI against CPAC 15 |
|---------------------------------------|--------------------------|------------|---------|--------------------|------------------|------------------|-------------|---------------------|
| <b><i>B. japonicum</i> group</b>      |                          |            |         |                    |                  |                  |             |                     |
| CNPSo 17 (P)                          | CP136588                 | 9,609,914  | 1       | 0                  | 102              | 8,796            | 301         | 99.9872             |
| CNPSo 22                              | CP141637-CP141639        | 10,295,385 | 3       | 2                  | 206              | 9,335            | 439         | 99.9391             |
| CNPSo 23                              | CP139647                 | 9,586,320  | 1       | 0                  | 146              | 8,758            | 310         | 99.9961             |
| CNPSo 24                              | CP138298                 | 9,584,431  | 1       | 0                  | 76               | 8,765            | 299         | 99.9966             |
| CNPSo 29                              | CP138299-CP138301        | 10,284,125 | 3       | 2                  | 63               | 9,303            | 447         | 99.9359             |
| CNPSo 31                              | CP138302-CP138304        | 10,280,370 | 3       | 2                  | 225              | 9,305            | 434         | 99.9392             |
| CNPSo 34                              | CP139648-CP139650        | 10,357,443 | 3       | 2                  | 144              | 9,467            | 433         | 99.9266             |
| CNPSo 38                              | JAXIOH000000000          | 10,367,856 | 4       | 2                  | 94               | 9,472            | 447         | 99.922              |
| CPAC 15 (R)                           | CP007569                 | 9,583,027  | 1       | 0                  | 20               | 8,653            | 336         | 100                 |
| Strain                                | GenBank accession number | Size (bp)  | Contigs | Number of plasmids | Coverage (-fold) | CDS with protein | Pseudogenes | ANI against CPAC 7  |
| <b><i>B. diazoefficiens</i> group</b> |                          |            |         |                    |                  |                  |             |                     |
| CNPSo 10 (P)                          | CP139628                 | 9,140,459  | 1       | 0                  | 83               | 8,230            | 280         | 99.9986             |
| CNPSo 104                             | CP139629                 | 9,140,039  | 1       | 0                  | 168              | 8,231            | 285         | 99.9978             |
| CNPSo 105                             | CP139630                 | 9,140,270  | 1       | 0                  | 95               | 8,236            | 269         | 99.9988             |
| CNPSo 106                             | CP139631                 | 9,120,098  | 1       | 0                  | 60               | 8,220            | 270         | 99.9971             |
| CNPSo 107                             | CP139632                 | 9,138,100  | 1       | 0                  | 37               | 8,224            | 279         | 99.9983             |
| CNPSo 108                             | CP139633                 | 9,138,003  | 1       | 0                  | 41               | 8,235            | 270         | 99.9989             |
| CNPSo 109                             | CP139634                 | 9,138,085  | 1       | 0                  | 109              | 8,244            | 264         | 99.9985             |
| CNPSo 110                             | CP139635                 | 9,138,906  | 1       | 0                  | 109              | 8,230            | 275         | 99.9988             |
| CPAC 7 (R)                            | CP139636                 | 9,138,870  | 1       | 0                  | 66               | 8,235            | 275         | 100                 |

1015

1016

1017 **Table 3.** Nucleotide polymorphisms within symbiosis island A potentially related to competitiveness for nodule occupancy or biological  
 1018 nitrogen fixation, which were detected in comparisons between the parental strain (P) or variant strains and the corresponding reference  
 1019 strain, *B. japonicum* CPAC 15.

| Location<br>(reference<br>genome) | SI | Gene                                                                           | Variation | Effect                     | Strain*             |             |             |             |             |             |             |             |
|-----------------------------------|----|--------------------------------------------------------------------------------|-----------|----------------------------|---------------------|-------------|-------------|-------------|-------------|-------------|-------------|-------------|
|                                   |    |                                                                                |           |                            | CNP<br>So 17<br>(P) | CNPSo<br>22 | CNPSo<br>23 | CNPSo<br>24 | CNPSo<br>29 | CNPSo<br>31 | CNPSo<br>34 | CNPSo<br>38 |
| 7,592,401                         | A  | PAS domain S-box<br>protein                                                    | GATC→G    | In-frame<br>deletion (Ile) | -                   | -           | -           | -           | -           | -           | X           | -           |
| 7,712,951                         | A  | <i>nfeC</i>                                                                    | T→C       | 65 bp<br>upstream          | X                   | X           | -           | -           | X           | X           | X           | X           |
| 7,725,412                         | A  | YopT-type protease                                                             | C→A       | Ser→Ile                    | -                   | X           | -           | -           | X           | X           | X           | X           |
| 7,767,388                         | A  | <i>nolY</i>                                                                    | G→T       | Ser→Ile                    | -                   | X           | -           | -           | X           | X           | X           | X           |
| 7,879,345                         | A  | <i>abiEi</i>                                                                   | T→G       | His→Pro                    | X                   | -           | -           | -           | -           | -           | -           | -           |
| 8,057,934                         | A  | DUF1521 domain-<br>containing protein                                          | A→C       | Phe→Val                    | -                   | -           | -           | X           | -           | -           | -           | -           |
| 8,084,530                         | A  | <i>fixB</i>                                                                    | C→A       | 132 bp<br>upstream         | X                   | X           | -           | -           | X           | X           | X           | X           |
| 8,096,472                         | A  | <i>nifS</i>                                                                    | T→C       | Thr→Ala                    | -                   | X           | -           | -           | X           | X           | X           | X           |
| 8,104,890                         | A  | <i>nifE</i>                                                                    | T→C       | Ile→Val                    | -                   | X           | -           | -           | X           | X           | X           | X           |
| 8,130,506                         | A  | C4-dicarboxylate                                                               | C→G       | Ala→Gly                    | -                   | -           | -           | -           | -           | -           | -           | X           |
| 8,823,770                         | C  | L,D-transpeptidase                                                             | G→T       | Glu→Asp                    | X                   | -           | -           | -           | -           | -           | -           | -           |
| 8,874,722                         | C  | C48 family peptidase                                                           | C→G       | Ala→Pro                    | X                   | X           | X           | X           | X           | X           | X           | X           |
| 8,931,455                         | C  | Hypothetical protein                                                           | CG→GC     | Ser→Cys                    | -                   | X           | -           | -           | -           | -           | -           | -           |
| 8,991,027                         | C  | relaxase/mobilization<br>nuclease and<br>DUF3363 domain-<br>containing protein | T→G       | His→Pro                    | -                   | X           | -           | -           | -           | -           | -           | -           |

1020 \* For each polymorphism, the strains carrying that polymorphism are indicated with an X.

1021 **Table 4.** Nucleotide polymorphisms within symbiosis island A potentially related to competitiveness for nodule occupancy or biological  
 1022 nitrogen fixation, which were detected in comparisons between the parental strain (P) or variant strains and the corresponding reference  
 1023 strain, *B. diazoefficiens* CPAC 7.

| Location<br>(reference<br>genome) | SI | Gene                                                 | Variation | Effect                 | Strain          |              |              |              |              |              |              |              |
|-----------------------------------|----|------------------------------------------------------|-----------|------------------------|-----------------|--------------|--------------|--------------|--------------|--------------|--------------|--------------|
|                                   |    |                                                      |           |                        | CNPSo 10<br>(P) | CNPSo<br>104 | CNPSo<br>105 | CNPSo<br>106 | CNPSo<br>107 | CNPSo<br>108 | CNPSo<br>109 | CNPSo<br>110 |
| 7,535,266                         | A  | <i>nfeC</i>                                          | GT→G      | 108 bp<br>upstream     | X               | X            | X            | X            | X            | X            | X            | X            |
| 7,786,768                         | A  | pentapeptide<br>repeat domain-<br>containing protein | AC→A      | Frameshift<br>deletion | X               | X            | X            | X            | X            | X            | X            | X            |
| 8,896,771                         | A  | GNAT family N-<br>acetyltransferase                  | TG→T      | Frameshift<br>deletion | X               | X            | X            | X            | X            | X            | X            | X            |

1024 \* For each polymorphism, the strains carrying that polymorphism are indicated with an X.



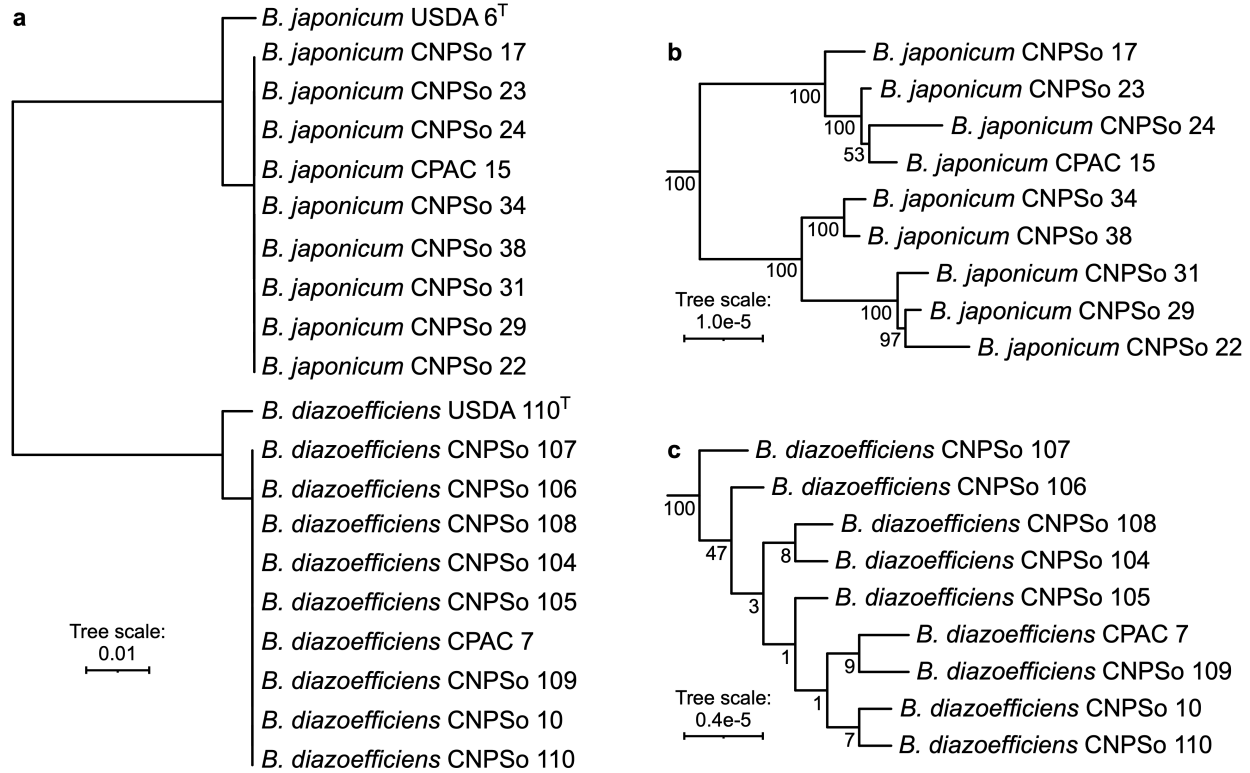

1025

1026

1027 **Figure 1.** Unrooted phylogeny of reference, parental, and variant strains of the *B. japonicum* and

1028 *B. diazoefficiens* groups. **(a)** A maximum likelihood phylogeny of all strains was prepared from a

1029 concatenated alignment of 2,689 core genes. The scale represents the mean number of nucleotide

1030 substitutions per site. Sub-trees of the **(a)** the *B. japonicum* and **(b)** the *B. diazoefficiens* groups are

1031 shown with a different branch length scale to better display the within-group relationships.

1032 Numbers at the nodes indicate the bootstrap values, based on 1,000 bootstrap replicates.

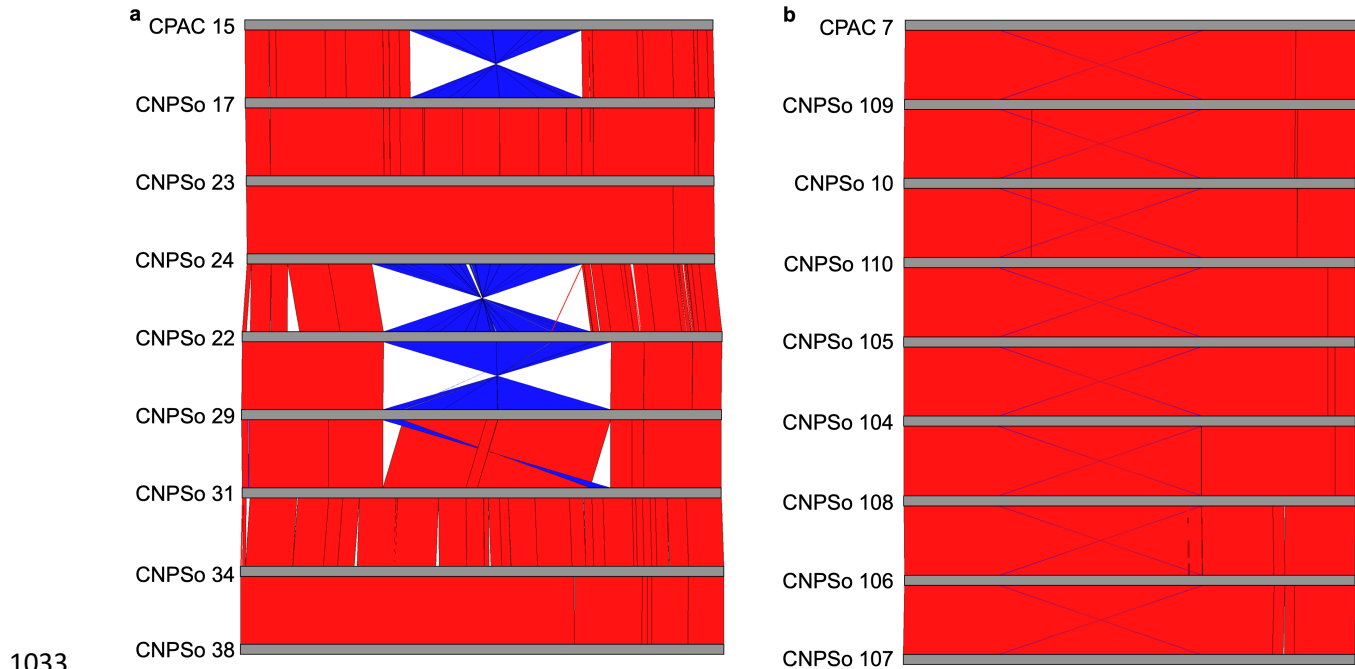

1033

1034

1035 **Figure 2.** Genome-wide synteny analysis of the (a) *B. japonicum* and (b) *B. diazoefficiens* parental

1036 strains (CNPSo 17 and CNPSo 10), reference strains (CPAC 15 and CPAC 7), and other variants.

1037 Pairwise genome alignments were performed, and homologous regions between pairs of genomes

1038 are connected by red lines (if in the same orientation) or blue lines (if in the inverse orientation).

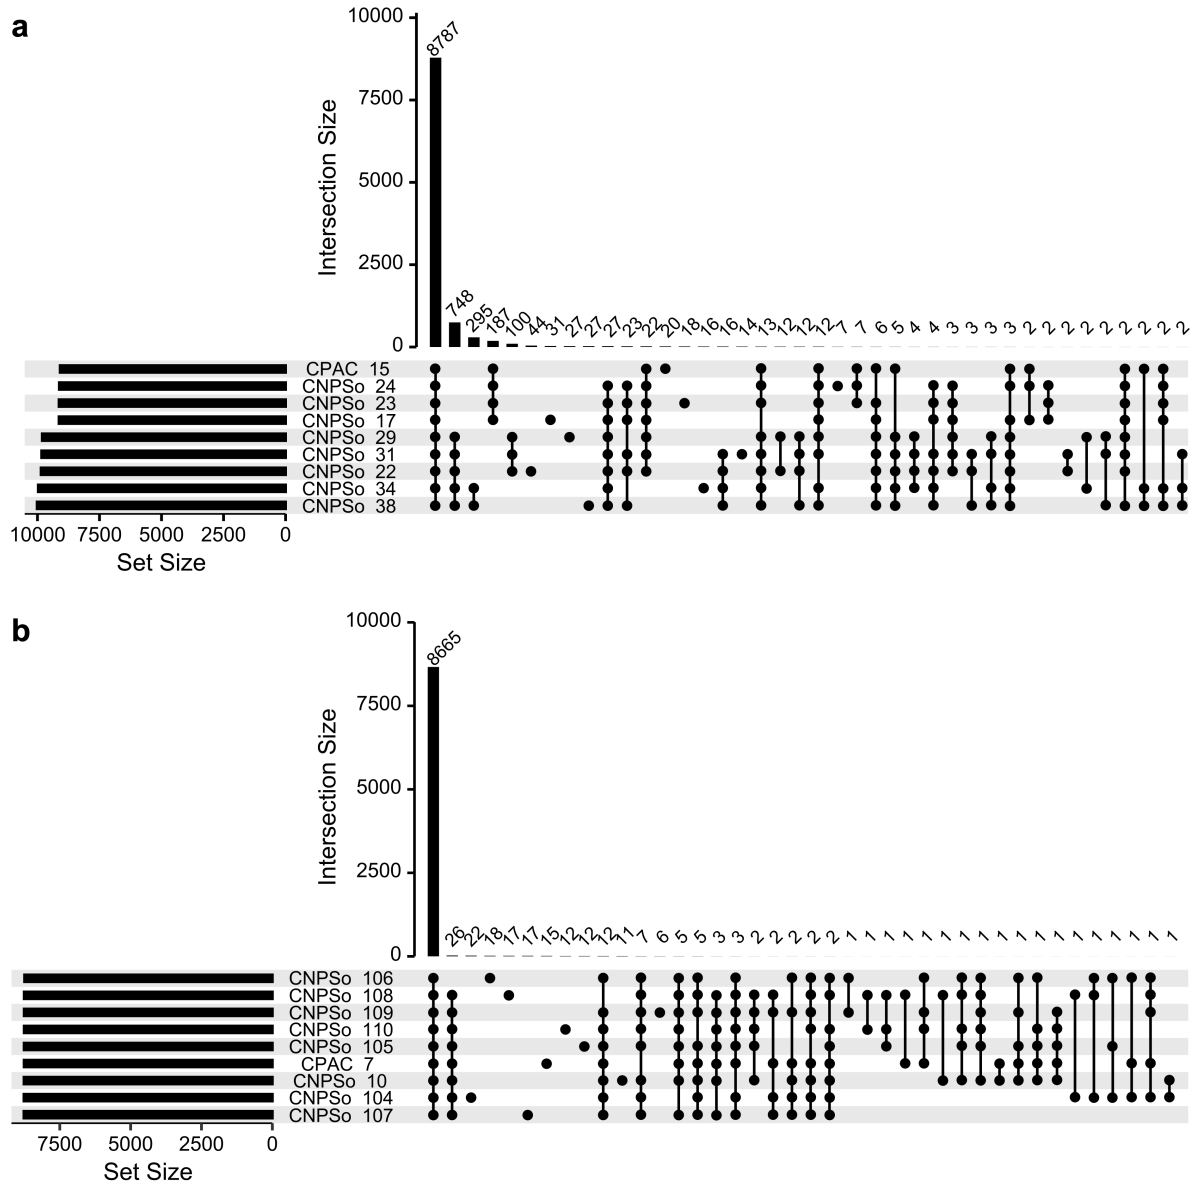

1039

1040

1041 **Figure 3.** UpSet plot summarizing the pangenome of the reference, parental, and variant strains of

1042 the (a) *B. japonicum* group or (b) *B. diazoefficiens* group. The set size shows the total number of

1043 gene families in a given genome, while the intersect size shows the number of gene families

1044 conserved across the indicated proteomes.
